# Evidence for Deleterious Antigenic Imprinting in SARS-CoV-2 Immune Response

Sanjana R. Sen<sup>1</sup>, Emily C. Sanders<sup>2</sup>, Alicia M. Santos<sup>2</sup>, Keertna Bhuvan<sup>2</sup>, Derek Y. Tang<sup>2</sup>, Aidan A. Gelston<sup>2</sup>, Brian M. Miller<sup>2</sup>, Joni L. Ricks-Oddie<sup>3,4</sup> and Gregory A. Weiss<sup>1,2,5\*</sup>

## Author Affiliations:

<sup>1</sup> Department of Molecular Biology & Biochemistry, University of California, Irvine, Irvine CA 92697-3900 USA

<sup>2</sup> Department of Chemistry, University of California, Irvine, Irvine CA 92697-2025 USA

<sup>3</sup> Center for Statistical Consulting, Department of Statistics, University of California, Irvine, Irvine CA 92697-1250 USA

<sup>4</sup> Biostatistics, Epidemiology and Research Design Unit, Institute for Clinical and Translational Sciences, University of California, Irvine, Irvine CA 92697-4094 USA

<sup>5</sup> Department of Pharmaceutical Sciences, University of California, Irvine, Irvine CA 92697-3958 USA

\* Address correspondence to [gweiss@uci.edu](mailto:gweiss@uci.edu)

## Corresponding Author:

\*GAW e-mail: [gweiss@uci.edu](mailto:gweiss@uci.edu), Tel: +1-949-824-5566, address: 1102 Natural Sciences 2, Irvine, CA 92697-2025, USA

## Author Contributions:

S.R.S., and G.A.W. designed research; S.R.S., E.C.S., A.M.S., K.B., D.Y.T, A.A.G., and B.M.M. performed research; S.R.S., E.C.S. and G.A.W. analyzed data; J.L.R. advised on statistical analysis; S.R.S. and G.A.W. wrote the manuscript.

## Competing Interests:

None.

## Acknowledgements:

We thank Professor Elizabeth Bess and Professor Stacey Schultz-Cherry for helpful conversations, Kristin Gabriel for initial bioinformatics analysis, and the patients who generously donated their plasma samples (IRB# 2012-8716). We gratefully acknowledge the support of the UCI COVID-19 Basic, Translational and Clinical Research Fund (CRAFT), the Allergan Foundation, and UCOP Emergency COVID-19 Research Seed Funding. A.M.S thank the Minority Access to Research Careers (MARC) Program, funded by the NIH (GM-69337). J.L.R.-O. was supported by the National Center for Research Resources and the National Center for Advancing Translational Sciences from the NIH (TR001414).

## 39 **Abstract**

40 A previous report demonstrated the strong association between the presence of  
41 antibodies binding to an epitope region from SARS-CoV-2 nucleocapsid, termed Ep9, and  
42 COVID-19 disease severity. Patients with anti-Ep9 antibodies (Abs) had hallmarks of antigenic  
43 imprinting (AIM), including early IgG upregulation and cytokine-associated injury. Thus, the  
44 immunological memory of a previous infection was hypothesized to drive formation of suboptimal  
45 anti-Ep9 Abs in severe COVID-19 infections. This study identifies a putative primary antigen  
46 capable of stimulating production of cross-reactive, anti-Ep9 Abs. Binding assays with patient  
47 blood samples directly show cross-reactivity between Abs binding to Ep9 and only one  
48 bioinformatics-derived, homologous potential antigen, a sequence derived from the  
49 neuraminidase protein of H3N2 Influenza A virus. This cross-reactive binding is highly influenza  
50 strain specific and sensitive to even single amino acid changes in epitope sequence. The  
51 neuraminidase protein is not present in the influenza vaccine, and the anti-Ep9 Abs likely resulted  
52 from the widespread influenza infection in 2014. Therefore, AIM from a previous infection could  
53 underlie some cases of COVID-19 disease severity.

## 54 **Importance**

55 Infections with SARS-COV-2 result in diverse disease outcomes, ranging from asymptomatic to  
56 fatal. The mechanisms underlying different disease outcomes remain largely unexplained.  
57 Previously, our laboratory identified a strong association between the presence of an antibody  
58 and increased disease severity in a subset of COVID-19 patients. Here, we report that this  
59 severity-associated antibody cross-reacts with viral proteins from an influenza A viral strain from  
60 2014. Therefore, we speculate that antibodies generated against previous infections, like the 2014  
61 influenza A, play a significant role in directing some peoples' immune responses against SARS-  
62 COV-2. Such understanding of the sources and drivers of COVID-19 disease severity can help  
63 early identification and pre-emptive treatment.

## 64 **Introduction**

65 Original antigenic sin or antigenic imprinting (AIM) occurs when the immune response  
66 adapted for a primary (or “original”) infection instead targets a similar, but not identical, pathogen<sup>1</sup>.  
67 Since B-cells undergo affinity maturation post-primary infection, cross-reactive Abs from previous  
68 infections can outcompete naïve Abs<sup>2</sup>. AIM ideally accelerates pathogen clearance by targeting  
69 highly conserved antigens; however, suboptimal targeting by non-neutralizing, Ab binding can  
70 exacerbate disease<sup>2</sup>. The range of outcomes observed in COVID-19, from asymptomatic to fatal,  
71 could result from a patient’s immunological memory<sup>1,3</sup>.

72 Ab cross-reactivity from AIM causes a wide range of disease outcomes. For example,  
73 some Abs from healthy individuals previously exposed to other common human coronaviruses  
74 (hCoV) could cross-react with SARS-CoV-2 spike protein to neutralize viral pseudotypes<sup>4</sup>.  
75 However, other prepandemic Abs with cross-reactivity to SARS-CoV-2 nucleocapsid (NP) and  
76 spike proteins did not protect against severe symptoms<sup>5</sup>. Humoral immunity to hCoVs, NL63 and  
77 229E<sup>6</sup>, respiratory syncytial virus, cytomegalovirus and herpes simplex virus-1<sup>7,8</sup> has been  
78 associated with more severe COVID-19 disease.

79 The presence of Abs with affinity for a 21-mer peptide derived from SARS-CoV-2 NP, an  
80 epitope region termed Ep9, have been correlated with severe COVID-19. The patients, termed  
81  $\alpha$ Ep9(+), comprised  $\approx 27\%$  of the sampled, SARS-CoV-2-infected population ( $n = 186$ ). The  
82  $\alpha$ Ep9(+) patients ( $n = 34$ ) had high, early levels of  $\alpha$ N IgGs, typically within the first week,  
83 compared to  $\alpha$ Ep9(-) patients;  $\alpha$ Ep9(+) individuals also experienced cytokine-related, immune  
84 hyperactivity<sup>9</sup>. These two observations suggest an AIM-based mechanism for the disease severity  
85 observed in  $\alpha$ Ep9(+) patients. Here, we explore the epitope homology landscape and  $\alpha$ Ep9 Ab  
86 cross-reactivity to potentially identify an original antigen driving Ab-based immune response in  
87  $\alpha$ Ep9(+) patients.

88

## 89 **Results and Discussion**

90 Assays measured levels of  $\alpha$ Ep9 IgGs and IgMs from  $\alpha$ Ep9(+) patients whose plasma was  
91 collected at various times post-symptom onset (PSO). Consistent with the hallmarks of AIM  
92 tracing a prior infection,  $\alpha$ Ep9 IgG levels appeared elevated as early as one day PSO in one  
93 patients. Similar IgG levels were observed in the patient population over >4 weeks (one-way  
94 ANOVA,  $p = 0.321$ ); thus,  $\alpha$ Ep9 IgG started high and remained high. Levels of  $\alpha$ Ep9 IgMs amongst  
95 patients at various times PSO were also similar (one-way ANOVA,  $p = 0.613$ ). The signals  
96 measured for  $\alpha$ Ep9 IgM levels were significantly lower than the equivalent  $\alpha$ Ep9 IgG levels (t-test,  
97  $p = 0.0181$ ) (Figure S1A); this difference could reflect lower IgM affinity, quantity, or both.

98 Searches for sequence and structural homologs of Ep9 using pBLAST<sup>10</sup> and VAST<sup>11</sup>  
99 databases suggested candidate primary antigens. A structural homolog from betaherpesvirus 6A  
100 and 14 other Ep9 sequence homologs were identified. Additionally, Ep9-orthologous regions from  
101 six human coronaviruses (SARS-CoV, MERS, OC43, HKU-1, NL63, 229E) were chosen for  
102 subsequent assays (Figure 1A, and Table S1). To expedite the binding measurements, the  
103 potential AIM epitope regions were subcloned into phagemids encoding the sequences as fusions  
104 to the M13 bacteriophage P8 coat protein. DNA sequencing and ELISA experiments  
105 demonstrated successful cloning and consistent phage display, respectively. Two epitopes failed  
106 to display on phage and were omitted from subsequent investigation (Table S2 and Figure S2A).

107 Phage ELISAs tested binding by Ep9 homologs to  $\alpha$ Ep9 Abs. An average response within  
108 the patient population was assessed using pooled plasma from three sets of five  $\alpha$ Ep9(+) and five  
109  $\alpha$ Ep9(-) COVID-19 patients coated onto ELISA plates. Plasma from healthy individuals provided  
110 an additional negative control. Confirming previously reported results, SARS-COV-2 Ep9 and a  
111 homologous epitope from SARS-CoV-1 (90% similarity) bound only to plasma from  $\alpha$ Ep9(+)  
112 patients<sup>9</sup>. The  $\alpha$ Ep9 Ab affinity for SARS-CoV-1 is unlikely to drive SARS-CoV-2 AIM due to the  
113 former's limited spread in the US<sup>12</sup>.

114           The panel of potential epitopes revealed a candidate epitope from the neuraminidase (NA)  
115 protein of an H3N2 influenza A strain, which circulated in 2014 (A/Para/128982-IEC/2014,  
116 Accession No. AIX95025.1), termed EpNeu here. The plasma from  $\alpha$ Ep9(+), but not  $\alpha$ Ep9(-)  
117 patients nor healthy individuals, bound EpNeu ( $p < 0.0001$ , two-way ANOVA *ad hoc* Tukey test)  
118 (Figure 1C, D). Though Ep9 and EpNeu share 38% amino acid sequence similarity, other  
119 candidate epitope regions with significantly higher homology failed to bind to  $\alpha$ Ep9(+) plasma  
120 (Table S1).

121           Next, the specificity of  $\alpha$ Ep9 Abs binding to NA from different viral strains was explored.  
122 EpNeu provided a template for further homolog searches in sequence databases. Closely aligned  
123 NA sequences isolated from human, avian, and swine hosts in North America were chosen for  
124 further analysis (Figure 1F, Table S1). The sequences were phage-displayed as before. Despite  
125 their close similarity to EpNeu (up to 92.3% similarity or only one residue difference), none of the  
126 EpNeu homologs bound to Abs from  $\alpha$ Ep9(+) patients (Figure 1E). A single EpNeu amino acid  
127 substitution, K142N (numbering from full-length NA, Accession No. AID57909.1) in an H1N2  
128 swine flu (2016) dramatically decreased binding affinity to Abs from  $\alpha$ Ep9(+) patients ( $p < 0.0001$   
129 one-way ANOVA *ad hoc* Tukey). An epitope H4N6 avian influenza A (2010) missing residue  
130 S141, but including conserved K142, also greatly reduced binding to Abs from  $\alpha$ Ep9(+) patients  
131 ( $p < 0.0001$  one-way ANOVA *ad hoc* Tukey) (Figure 1E, 1F). Therefore, S141 and K142 are critical  
132 for binding to  $\alpha$ Ep9 Abs.

133           Do Ep9 and EpNeu epitopes bind the same Abs? Data from 34  $\alpha$ Ep9(+) patients  
134 demonstrated a strong, highly significant correlation between levels of Abs binding to Ep9 and  
135 EpNeu epitopes in patient plasma (Figure 2A). Cross-reactivity was confirmed by a sandwich-  
136 format assay requiring bivalent, simultaneous binding to both eGFP-fused Ep9 and phage-  
137 displayed EpNeu (Figure 2B, S3). Cross-reactive Ab binding both Ep9 and EpNeu epitopes in

138 pooled plasma from  $\alpha$ Ep9(+) patients, but not in  $\alpha$ Ep9(-) patients with other  $\alpha$ NP Abs or healthy  
139 donors was demonstrated. Thus, we conclude that  $\alpha$ Ep9 Abs also recognize the EpNeu epitope.

140 We then investigated whether EpNeu could present a viable antigen during infection with  
141 2014 H3N2 (NCBI: txid1566483). Linear epitope analysis of full-length NA protein (Bepipred 2.0)<sup>13</sup>  
142 predicted a candidate antigen with eight residues from EpNeu, including S141 and K142, and ten  
143 additional residues (146-155). This predicted epitope region, termed EpPred, includes the  
144 conserved catalytic NA residue D151 targeted for viral neutralization by the immune system<sup>14</sup>  
145 (Figures 2C, and S4A). A model structure of 2014 H3N2 NA from Swiss-Model<sup>15</sup> and structural  
146 epitope prediction (Discotope 2.0)<sup>16</sup> also identified potential epitopes within EpPred (Figures 2C,  
147 D and S4B).

148 eGFP-fused EpPred (Figure S2B) was assayed with pooled plasma from five  
149  $\alpha$ Ep9(+) patients. Controls included EpNeu and Ep9 (positive) and eGFP FLAG (negative). The  
150  $\alpha$ Ep9 Abs bound to Ep9 with  $\approx$ 2-fold stronger apparent affinity than for EpNeu (Figure 2E). The  
151 increased binding strength of Ep9 could result from additional rounds of Ab affinity maturation  
152 after the primary infection<sup>2</sup>. The longer length EpPred modestly improved upon the binding of  
153 EpNeu to  $\alpha$ Ep9 Abs (Figure 3C). Thus,  $\alpha$ Ep9 Abs likely target a larger epitope of H3N2 2014 NA  
154 beyond regions homologous to Ep9; full-length NA's balkiness to overexpression makes this  
155 difficult to test<sup>17</sup>. Additionally, the bacterially overexpressed epitopes assayed here do not include  
156 post-translational modifications. Taken together, the results support the hypothesis that  $\alpha$ Ep9 Abs  
157 found in severe COVID-19 disease can result from AIM with H3N2 influenza A. Unfortunately,  
158 patient histories typically do not include influenza infections and vaccinations. Isolated from Para,  
159 Brazil, the H3N2 2014 strain has unknown spread in North America. However, a severe outbreak  
160 of influenza A was recorded in 2014<sup>18,19</sup>. Since only hemagglutinin was sequenced for strain  
161 identification in 2014<sup>19</sup>, the candidate AIM strain from the current investigation could not be  
162 effectively traced as only its NA sequence was available. Notably, the EpNeu homolog from the

163 2014 vaccine H3N2 strain (identical to Flu A 2015 H3N2 NA, Accession No. ANM97445.1) does  
164 not bind  $\alpha$ Ep9 Abs (Figure 1 E, F). Therefore,  $\alpha$ EpNeu Abs must have been generated against a  
165 primary influenza infection, not the vaccine.

166 This report offers a molecular mechanism for AIM underlying the high-rate of severe  
167 COVID-19 in  $\alpha$ Ep9(+) patients. Specifically, we demonstrate cross-reactive binding between  
168  $\alpha$ Ep9 Abs and a predicted NA epitope from a 2014 influenza A strain. Future studies could  
169 examine correlation between a country's rate of the H3N2 2014 influenza and severe COVID-19.  
170 Additionally, correlation could be tested using health systems that record influenza infections.  
171 Examining epitope conservation and Ab cross-reactivity could predict AIM-based immune  
172 responses and disease outcomes in future infections. Identifying detrimental, benign or beneficial  
173 AIM pathways could also guide vaccine design.

174

175

176

177

178

179

180

181

182

183

184

185 **Figures (main text)**

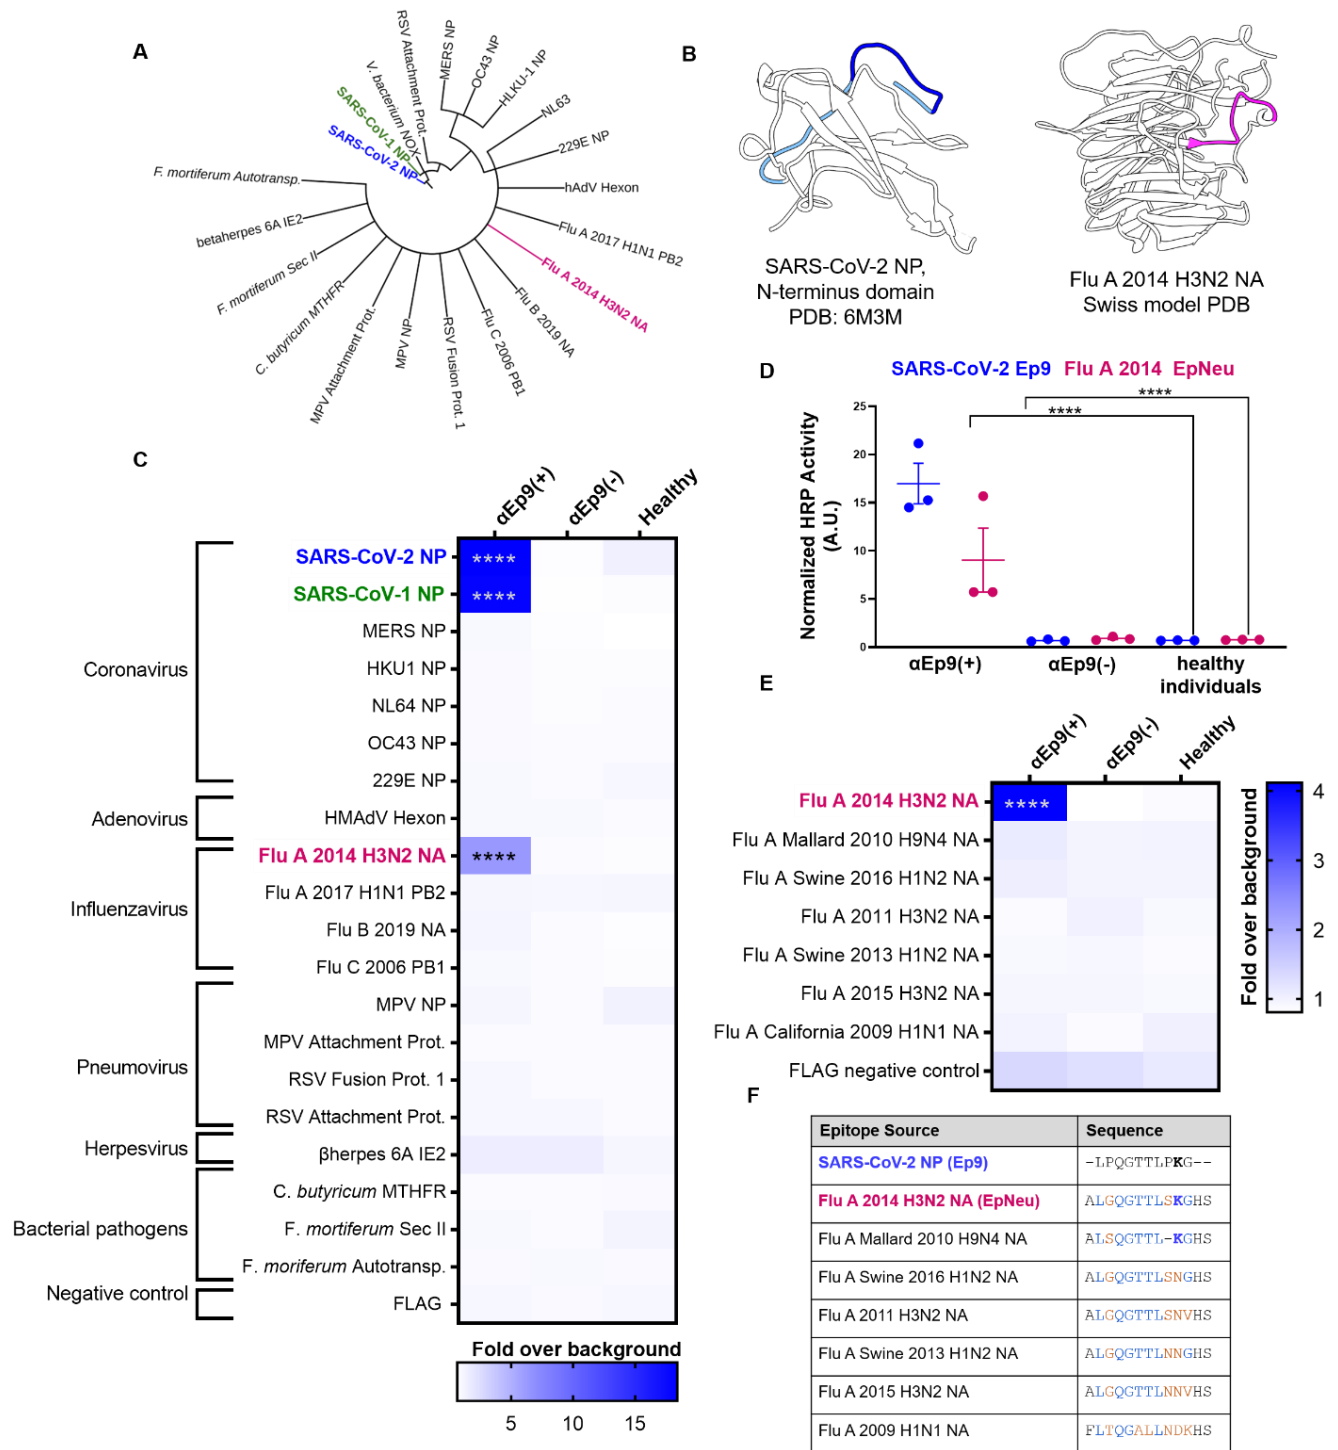

186

187 **Figure 1 | Potential OAS epitopes for binding  $\alpha$ Ep9 Abs suggested by bioinformatics and**  
 188 **tested by phage ELISA. (A) Cladogram depicting sequence homology of the Ep9 sequence from**



189 SARS-CoV-2 to the bioinformatics-identified, closest homologs. Sequence alignments used  
190 pBLAST and VAST, and the cladogram was generated by iTOL<sup>20</sup>. **(B)** Structures of SARS-CoV-  
191 2 NP RNA binding domain (PDB: 6M3M) and the Flu A 2014 H3N2 NA protein (modeled by  
192 SWISS-Model<sup>21</sup>). SARS-CoV-2 NP highlights Ep9 residues (light and dark blue) and the region  
193 homologous region to EpNeu (dark blue). The depicted model of Flu A 2014 H3N2 NA highlights  
194 the EpNeu putative antigen (pink). **(C)** ELISAs examined binding of phage-displayed potential  
195 OAS epitopes to Abs from three sets of pooled plasma from five  $\alpha$ Ep9(+) patients, or five  $\alpha$ Ep9(-  
196 ) patients. Pooled plasma from healthy patients was an additional negative control. The colors of  
197 the heat map represent the mean binding signal normalized to phage background negative  
198 controls (signal from phage without a displayed peptide). **(D)** Expansion of data from panel C  
199 shows ELISA signals from the independently assayed individual pools shows results from the  
200 individual pools (\*\*\*\* $p < 0.0001$  for a two-way ANOVA comparing binding of phage-displayed  
201 epitopes listed in panel C to different groups of pooled plasma, *ad hoc* Tukey test). **(E)** Using  
202 EpNeu as the search template to generate homologous sequences (shown in next panel), ELISAs  
203 examined EpNeu homologs' binding to pooled plasma from  $\alpha$ Ep9(+),  $\alpha$ Ep9(-), or healthy  
204 individuals. The data are represented as described in panel C (\*\*\*\* $p < 0.0001$  for two-way ANOVA  
205 c phage-displayed epitopes, *ad hoc* Tukey and Dunnett's test as shown). **(F)** Amino acid  
206 sequence alignment of the closely related Flu A NA homologs of EpNeu from pBLAST. Blue and  
207 orange residues represent conserved and mismatched amino acids, respectively, relative to Ep9.  
208 Bolded residues are important for epitope recognition by  $\alpha$ Ep9 Abs. Here, the term Flu refers to  
209 influenza.

210

211

212

213

214

215

216

217

218

219

220

221

222

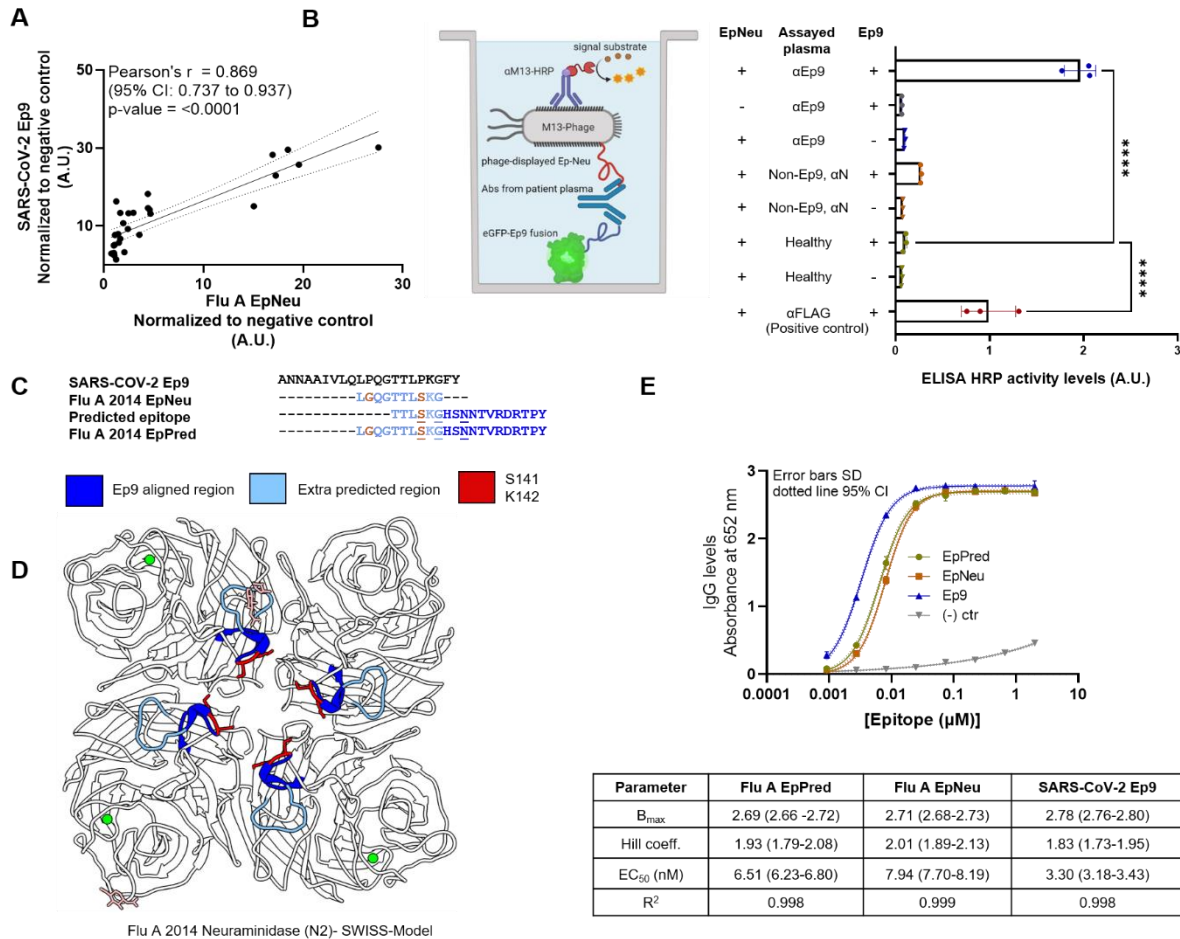

223

224 **Figure 2 | Cross-reactive Ab binding to both Ep9 and EpNeu, and EpNeu epitope prediction.**

225 (A) Comparing normalized levels of phage-displayed Ep9 and EpNeu binding to plasma-coated  
 226 wells from individual  $\alpha$ Ep9(+) patients ( $n = 34$ ). A strong correlation is observed, as shown by the  
 227 depicted statistics. Each point in panels A through C represents data from individual patients. (B)  
 228 A schematic diagram of the sandwich ELISA to examine cross-reactivity of  $\alpha$ Ep9 Abs. The assay  
 229 tests for bivalent Ab binding to both Ep9 and EpNeu. Pooled plasma from five  $\alpha$ Ep9(+) patients  
 230 or five  $\alpha$ Ep9(-) patients with other  $\alpha$ NP Abs was tested for bivalent binding to both eGFP-fused  
 231 Ep9 and phage-displayed EpNeu. Healthy patient plasma was used as a negative control. For  
 232 additional negative controls, phage-FLAG and eGFP-FLAG replaced Ep9 and EpNeu,  
 233 respectively (\*\*\*\* $p < 0.0001$  one-way ANOVA, *ad hoc* Tukey and Dunnett's test shown, with  
 234 healthy plasma in the presence of EpNeu and Ep9 as negative control). Error bars represent SD.  
 235 Individual points on bar graph represent technical replicates. (C) Linear and structural B-cell  
 236 epitope prediction tools Bepipred 2.0 and Discotope 2.0 suggested an extended, linear epitope  
 237 region from the influenza A H3N2 2014 NA, including the eight residues of Ep9 Neu (light blue)  
 238 with an additional ten, C-terminal residues (dark blue). This extended, predicted epitope is termed  
 239 EpPred. Structural epitope predictions are underlined. Residues on EpNeu that are not aligned  
 240 with Ep9 are depicted in orange. (D) Structural model depicting the influenza A H3N2 2014 NA.

241 The model was generated using SWISS-Model based on the NA structure from influenza A H3N2  
242 Tanzania 2010 (PDB: 4GZS). The NA structure highlights the EpNeu region (light blue), the  
243 extended residues in EpPred (dark blue), potential glycosylation sites (light pink), and the residues  
244 S141 and K142 (red), which are important for  $\alpha$ Ep9 Ab recognition. **(E)** Dose-dependent ELISA  
245 comparing binding of  $\alpha$ Ep9 Abs to Ep9, EpNeu and EpPred. Pooled plasma from five  $\alpha$ Ep9(+) patients and five  $\alpha$ Ep9(-) patients were tested in triplicates with varying concentrations of eGFP-  
246 fused epitopes. The data demonstrates the strongest interactions occurred between  $\alpha$ Ep9 Abs  
247 and Ep9 with an approximately 2-fold decrease in  $\alpha$ Ep9 Abs binding affinity for EpNeu. EpPred  
248 bound slightly stronger to  $\alpha$ Ep9 Abs than EpNeu; the difference in trend lines of EpNeu and  
249 EpPred are statistically significant ( $p < 0.0001$ , Comparison of Fits). Trendlines represent non-  
250 linear regression fit with Hill slope analysis.  
251

252

## 253 **Supplementary Materials**

### 254 **Materials and Methods**

255

#### 256 **Sequence and structural alignment analysis**

257 To identify possible sources of primary infection responsible for  $\alpha$ Ep9 Ab generation, sequence  
258 and structural alignment with Ep9 residues and the SARS-CoV-2 NP was conducted. Alignment  
259 of Ep9 sequence with the orthologs from other human coronaviruses (hCoVs) such as SARS-  
260 CoV, MERS, HKU-1, NL63, 229E and OC43 was conducted using the Benchling sequence  
261 alignment tool <sup>22</sup> (<https://benchling.com>). To explore a wider range of human host pathogens  
262 pBLAST <sup>10</sup> (<https://blast.ncbi.nlm.nih.gov/Blast.cgi>) was used to search for Ep9 homology in a  
263 database of non-redundant protein sequences; common human-host viruses were specified in  
264 the organism category. The queries were conducted with the blastp (protein-protein BLAST)  
265 program <sup>10</sup> with search parameters automatically adjusted for short input sequences. Alignments  
266 spanning >7 residues were included here. The Vector Alignment Search Tool (VAST) <sup>11</sup>  
267 (<https://structure.ncbi.nlm.nih.gov/Structure/VAST/vast.shtml>) was used to find structural  
268 alignment between SARS-CoV-2 Ep9 and proteins from other viral and bacterial human host  
269 pathogens. Alignment for NP from common hCoV were not further examined, as they had been  
270 included in sequence alignment analysis. The aligned sequences were sorted by the number of  
271 aligned residues as well as root-mean square deviation (RMDS). The top 50 structurally aligned  
272 proteins were then examined for structural homology in the Ep9 epitope region. Regions of  
273 proteins that aligned with the Ep9 region were selected for subsequent analysis.

274

#### 275 **Cloning**

276 Predicted AIM epitopes were subcloned for phage display using the pM1165a phagemid  
277 vector <sup>23</sup> with an N-terminal FLAG-tag and a C-terminal P8 M13-bacteriophage coat protein. AIM  
278 constructs were subcloned using the Q5 site-directed mutagenesis kit (New England Biolabs,

279 Ipswich, MA) as per manufacturer's instructions. After cloning, cells were transformed into XL-1  
280 Blue *E. coli* and spread on carbenicillin-supplemented (50 µg/ml) plates. Individual colonies were  
281 then inoculated into 5 ml cultures, and shaken overnight at 37 °C. The phagemid was isolated  
282 using the QIAprep spin miniprep kit (Qiagen, Germantown, MD) as per manufacturer's  
283 instructions. Cloned sequences were verified by Sanger sequencing (Genewiz, San Diego, CA).

284

### 285 **Phage propagation and purification**

286 The Ep9 homologs were expressed as N-terminal fusions to the P8 coat protein of M13  
287 bacteriophage. Plasmids were transformed into SS320 *E. coli* and spread onto carbenicillin-  
288 supplemented (50 µg/ml) LB-agar plates before overnight incubation at 37 °C. A single colony  
289 was inoculated into a primary culture of 15 ml of 2YT supplemented with 50 µg/ml carbenicillin  
290 and 2.5 µg/ml of tetracycline, and incubated at 37 °C with shaking at 225 rpm until an optical  
291 density at 600 nm (OD<sub>600</sub>) of 0.5 to 0.7 was reached. 30 µM IPTG and M13KO7 helper phage at  
292 an MOI 4.6 was added to the primary culture, and the culture was incubated for an additional 37  
293 °C with shaking at 225 rpm for 45 min. 8 ml of the primary culture was then transferred to 300 ml  
294 of 2YT supplemented with 50 µg/ml of carbenicillin and 20 µg/ml of kanamycin. The cultures were  
295 inoculated at 30 °C with shaking at 225 rpm for around 19 h.

296 The phage propagation culture was centrifuged at 9632 x *g* for 10 min at 4 °C. The  
297 supernatant, containing the phage, was transferred into a separate tubes pre-aliquoted with 1/5<sup>th</sup>  
298 volume of phage precipitation buffer (20% w/v PEG-8000 and 2.5 M NaCl), and incubated on ice  
299 for 30 min. The solution, containing precipitated phage, was centrifuged for 15 min at 4 °C, and  
300 the supernatant was discarded. The precipitated phage was centrifuged a second time at 1,541  
301 x *g* for 4 min at 4 °C, and then dissolved in 20 ml of resuspension buffer (10 mM phosphate, 137  
302 mM NaCl, pH 7.4 - 8.0 with Tween-20 0.05%, v/v and glycerol 10% v/v). The resuspended pellet  
303 solution was divided into 1 ml aliquots, which were flash frozen with liquid nitrogen for storage in  
304 -80 °C. Prior to use in ELISA binding assays, the aliquoted phage-displayed constructs were re-

305 precipitated in 0.2 ml of phage precipitation buffer after incubation for 30 min on ice. Aliquots were  
306 centrifuged at 12298 x *g* for 20 min at 4 °C and the supernatant was discarded. The phage pellets  
307 were re-centrifuged at 1968 x *g* for 4 min at 4 °C, and then resuspended in 1 ml of 10 mM  
308 phosphate, 137 mM NaCl, pH 7.4.

309

### 310 **Expression and Purification of eGFP fusion peptides**

311 pET28c plasmids encoding eGFP fusions to C-terminal Ep9-FLAG, EpNeu-FLAG,  
312 EpPred-FLAG and FLAG (negative control) and N-terminal His<sub>6</sub> peptide epitopes, were  
313 transformed into BL21DE3 Star *E. coli* chemically competent cells. Transformants were spread  
314 on carbenicillin-supplemented (50 µg/ml) LB-agar plates and incubated at 37 °C overnight. Single  
315 colonies of each construct were selected to inoculate 25 ml LB media supplemented with  
316 carbenicillin (50 µg/ml). After incubation at 37 °C with shaking at 255 rpm overnight, 5 ml of seed  
317 cultures were used to inoculate 500 ml of LB media supplemented with carbenicillin (50 µg/ml).  
318 Expression cultures were incubated at 37 °C with shaking at 225 rpm until an OD<sub>600</sub> of ~0.5 was  
319 reached. The cultures were induced with 0.5 mM IPTG and incubated at 25 °C for 18 h. The cells  
320 were pelleted by centrifugation at 9632 x *g* for 20 min and resuspended in Tris-HCl lysis buffer  
321 (20 mM Tris-HCl, 250 mM NaCl, pH 8). Cells were lysed by sonication and the insoluble fractions  
322 were pelleted by centrifugation at 24696 x *g*. The supernatant was affinity-purified using  
323 Profinity™ IMAC (BioRad, Hercules, CA) resin charged with nickel sulfate. The protein lysate was  
324 batch bound overnight to the IMAC resin and purified using gravity columns. Columns were  
325 washed with lysis buffer supplemented with 20 mM imidazole, and the elution fractions were  
326 collected from lysis buffer containing 250 mM imidazole. The elution fractions were then buffer-  
327 exchanged with lysis buffer lacking imidazole using Vivaspin® 20 Ultrafiltration Units (Sartorius,  
328 Goettingen, Germany) with a molecular weight cutoff of 10 kDa. The final buffer imidazole

329 concentrations were calculated to be ~0.1 mM. Purified and buffer-exchanged protein fractions  
330 were then visualized using 10% SDS-PAGE with Coomassie dye staining.

331

### 332 **Patient Sample Collection**

333 Samples were collected as previously described<sup>9</sup>. Briefly, the UC Irvine Experimental  
334 Tissue Resource (ETR) operates under a blanket IRB protocol (UCI #2012-8716) which enables  
335 sample collection in excess of requirements for clinical diagnosis, and allows distribution to  
336 investigators. Plasma was collected from daily blood draws of COVID(+) patients, initially  
337 confirmed with pharyngeal swabs. After immediate centrifugation, plasma from heparin-  
338 anticoagulated blood was stored for 3-4 days at 4 °C prior to its release for research use. Personal  
339 health information was omitted and unique de-identifier codes were assigned to patients to comply  
340 with the Non-Human Subjects Determination exemption from the UCI IRB. At the research facility,  
341 SARS-CoV-2 virus in plasma samples was inactivated through treatment by incubation in a 56 °C  
342 water bath for 30 min<sup>24</sup> prior to storage at -80 °C.

343

### 344 **Phage ELISAs**

345 As described in previous reports<sup>9</sup>, pooled plasma from five αEp9(+) patients, five αEp9(-  
346 ) patients, or healthy patients (Sigma-Aldrich, Saint Louis, MO) were separately prepared in  
347 coating buffer (50 mM Na<sub>2</sub>CO<sub>3</sub>, pH 9.6); the plasma was diluted 100-fold during this step. Plasma  
348 samples were then immobilized in 96 well microtiter plates by shaking the plasma solutions at  
349 150 rpm at room temperature (RT) for 30 min. After aspiration and washing by plate washer  
350 (BioTek, Winooski, VT), each well was blocked with 100 μL of ChonBlock Blocking Buffer (CBB)  
351 (Chondrex, Inc., Woodinville, WA) for 30 mins, shaking at 150 rpm at RT. Wells were  
352 subsequently washed three times with PBS-T (0.05% v/v Tween-20 in PBS). Next, 1 nM phage-  
353 displayed candidate “original” epitopes and controls prepared in CBB was incubated in microtiter  
354 wells for 1 h at RT with shaking at 150 rpm. Unbound phage were aspirated and removed using



355 three washes with PBS-T. The peroxidase-conjugated detection antibody,  $\alpha$ M13-HRP (Creative  
356 Diagnostics, Shirley, NY), was diluted 1000-fold in Chonblock Secondary Antibody Dilution  
357 (Chondrex, Inc., Woodinville, WA) buffer; 100  $\mu$ l of this solution was added to each well before  
358 incubation for 30 min at RT with shaking at 150 rpm. Following aspiration and three washes (100  
359  $\mu$ l each), 1-Step Ultra TMB-ELISA Substrate Solution (ThermoScientific, Carlsbad, CA) was  
360 added (100  $\mu$ l per well). Absorbance of TMB substrate was measured twice at 652 nm by UV-Vis  
361 plate reader (BioTek Winooski, VT) after 5 and 15 min of incubation. The experiment was  
362 repeated three times using plasma from different  $\alpha$ Ep9(+) and  $\alpha$ Ep9(-) patients for each  
363 experiments, using a total of 15 patients for each group. Each experiment was conducted in  
364 technical duplicate.

365

#### 366 **$\alpha$ Ep9 IgG and IgM ELISA**

367 Plasma from 34 patients, previously tested for the presence of  $\alpha$ Ep9 Abs using phage  
368 ELISAs<sup>9</sup>, were used to test levels of  $\alpha$ Ep9 IgGs and IgMs. 2  $\mu$ M eGFP-Ep9 or eGFP-FLAG in  
369 PBS pH 8.0 were immobilized onto 96 well microtiter plates via overnight incubation with shaking  
370 at 150 rpm at 4 °C. Excess protein was aspirated and removed with three consecutive PBS-T  
371 washes. Wells were blocked by adding CBB (100  $\mu$ l) before incubation at 30 min at RT with  
372 shaking at 150 rpm. Next,  $\alpha$ Ep9(+) patient plasma, diluted 1:100 in CBB (100  $\mu$ l), was added to  
373 duplicate wells before incubation at RT for 1 h with shaking at 150 rpm. The solutions were  
374 discarded and sample wells were washed with PBS-T three times.  $\alpha$ Ep9 Abs binding to the  
375 potential epitopes was detected using horse radish peroxidase (HRP) conjugated  $\alpha$ Human Fc  
376 IgG (Thermo Fisher Scientific, Waltham MA) or  $\alpha$ IgM  $\mu$ -chain specific (Millipore Sigma, Temecula,  
377 CA) Abs diluted 1:5000 in ChonBlock Sample Antibody Dilution buffer. 100  $\mu$ l of detection Abs  
378 were added to each sample well, and incubated for 30 min at RT with shaking at 150 rpm. Sample  
379 wells were aspirated and washed three times in PBS-T, and the binding signal was detected after  
380 addition of TMB substrate (100  $\mu$ l per well).



## 381 **Bivalent Abs binding ELISA**

382 eGFP-Ep9 or eGFP-FLAG was serially diluted (120 nM, 40 nM, 13 nM and 4 nM) in PBS  
383 pH 8.0, and added to the appropriate wells in 96 well microtiter plates, followed by shaking  
384 overnight at 150 rpm at 4 °C. Excess unbound protein was removed, and the plate was washed  
385 three times in PBS-T. Wells were then blocked in CBB and incubated for 30 min at RT. After  
386 blocking, pooled plasma (100 µl per well) from either five αEp9(+) patients, or five non-αEp9,  
387 αNP(+) patients, or healthy individuals was added to the appropriate wells. Plasma from pooled  
388 patients was diluted 100-fold in CBB. As a positive control αFLAG Ab was used as a 1:2000  
389 dilution in CBB. Samples were incubated for 1 h at RT with 150 rpm shaking. The solution was  
390 removed by aspiration, and the plate and washed three times with PBS-T. Then 1 nM EpNeu  
391 displaying phage or the phage negative control with no epitopes displayed was diluted in CBB.  
392 100 µl phage solution was added to microtiter wells and incubated for 30 min at RT with shaking  
393 at 150 rpm. After aspirating and washing off unbound phage, binding of phage-displayed EpNeu  
394 to plasma αEp9 Abs was visualized using αM13-HRP Ab diluted 1:10,000 in ChonBlock Sample  
395 Antibody Dilution buffer. Samples were incubated for 30 min at RT with 150 rpm shaking, and  
396 unbound Abs were removed through washing with PBS-T three times before addition of TMB  
397 substrate (100 µl). Experiments were conducted in technical triplicates and repeated three times  
398 with different αEp(+) and αEp(-) patient samples.

399

## 400 **Dose-dependent ELISA**

401 Wells of microtiter plates were coated with serially diluted concentration of eGFP-Ep9,  
402 EpNeu and EpPred or eGFP-FLAG, and incubated overnight at 4 °C before blocking as described  
403 above. Next, pooled plasma (100 µl per well) from either five αEp9(+) patients, or five αEp9(-)  
404 patients, or healthy individuals at 1:100 total plasma dilution in CBB was added to the appropriate  
405 wells. Samples were incubated for 1 h at RT with shaking at 150 rpm. After incubation, unbound  
406 solution was removed, and the plates were washed three times with PBS-T. αEp9 IgG levels were

407 detected by adding  $\alpha$ Fc IgG-HRP diluted 1:5000 in ChonBlock Sample Dilution buffer, followed  
408 by incubation for 30 min at RT with shaking at 150 rpm, followed by addition of TMB substrate  
409 (100  $\mu$ l per well). Experiments were conducted in technical triplicates and repeated three times  
410 with different  $\alpha$ Ep(+) and  $\alpha$ Ep(-) patient samples.

411

## 412 **Linear B-cell Epitope Prediction**

413 Linear epitopes from the Influenza A/Para/128982-IEC/2014(H3N2) neuraminidase  
414 protein were predicted using the partial sequence with Accession AIX95025.1 from the National  
415 Center for Biotechnology Information's GenBank and the linear B-cell epitope prediction tool,  
416 Bepipred 2.0<sup>13</sup> (<http://www.cbs.dtu.dk/services/BepiPred-2.0/>). The prediction thresholds were set  
417 to 0.5. The specificity and sensitivity of epitope prediction at this threshold is 0.572 and 0.586,  
418 respectively.

419

## 420 **Structure-based B-cell epitope prediction**

421 The structure of Influenza A/Para/128982-IEC/2014(H3N2) neuraminidase protein was  
422 modelled using Swiss-Model<sup>21</sup> (<https://swissmodel.expasy.org/interactive>). Using the ProMod3  
423 3.2.0 tool<sup>15</sup>, a structural model was generated based on the crystal structure (2.35Å, PDB 4GZS  
424 1.A) of a homologous H3N2 neuraminidase with 96.39% sequence identity. Modelling methods  
425 and quality assessments are further detailed in the report below.

426 The structural model of Influenza A/Para/128982-IEC/2014(H3N2) neuraminidase was used to  
427 predict structure-based epitopes. Using the *in silico* online platform DiscoTope 2.0<sup>16</sup>  
428 (<http://www.cbs.dtu.dk/services/DiscoTope-2.0/>), structure-based epitope propensity scores were  
429 calculated to predict likely B-cell epitope residues. The score of -3.7 was set as the threshold for  
430 epitope prediction, which estimates a specificity and sensitivity of 0.75 and 0.47, respectively  
431 (Figure S4)

432

433 **Statistical Analysis**

434 The ELISA data were analyzed in GraphPad Prism 9 (<https://www.graphpad.com>). Since  
435 the ELISA assays of 21 potential AIM epitopes were conducted over several microtiter plates for  
436 repeated experiments, the raw absorbance values for every patient sample were normalized and  
437 represented as the ratio of phage negative control to the signal. For heatmaps, two-way Analysis  
438 of variance (ANOVA) with a Tukey adjustment for multiple comparisons tests were conducted for  
439 the entire dataset of epitopes. For column comparisons of two groups, for example IgM levels and  
440 IgG levels in the  $\alpha$ Ep(+) patients, unpaired, two-tailed, parametric t-tests were applied.  
441 Additionally, for column comparisons between more than two groups, for example IgM or IgG  
442 levels groups by weeks PSO, One-way ANOVA with a Tukey adjustment for multiple comparisons  
443 tests were used. Where indicated, an ANOVA with a Dunnett's adjustment were performed to  
444 compare results to healthy Abs interactions to  $\alpha$ Ep9(+) patient results. Graphs represent SD error  
445 bars for technical replicates, defined as replicates of the same conditions in multiple wells of the  
446 same plate. Whereas error bars are shown as SEM when an experiment is repeated with different  
447 patient sample sets. Correlations between Ep9 and EpNeu levels in patients were determined by  
448 plotting normalized values on an XY graph and performing a linear Pearson's correlation  
449 coefficient test, where a  $r$  coefficient between 1.0-0.7 were considered strong correlations, values  
450 between 0.7 and 0.5 were considered a moderate correlation, and values below 0.5 were  
451 considered a weak correlation<sup>25</sup>. The significance of the correlation was evaluated based on p-  
452 value <0.05.

453

454

455

456

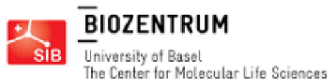

## SWISS-MODEL Homology Modelling Report

### Model Building Report

This document lists the results for the homology modelling project "Untitled Project" submitted to SWISS-MODEL workspace on March 30, 2021, 10:35 a.m.. The submitted primary amino acid sequence is given in Table T1.

If you use any results in your research, please cite the relevant publications:

- Waterhouse, A., Bertoni, M., Bienert, S., Studer, G., Tauriello, G., Gumienny, R., Heer, F.T., de Beer, T.A.P., Rempfer, C., Bordoli, L., Lepore, R., Schwede, T. SWISS-MODEL: homology modelling of protein structures and complexes. *Nucleic Acids Res.* 46(W1), W296-W303 (2018). [DOI](#)
- Bienert, S., Waterhouse, A., de Beer, T.A.P., Tauriello, G., Studer, G., Bordoli, L., Schwede, T. The SWISS-MODEL Repository - new features and functionality. *Nucleic Acids Res.* 45, D313-D319 (2017). [DOI](#)
- Studer, G., Tauriello, G., Bienert, S., Biasini, M., Johner, N., Schwede, T. ProMod3 - A versatile homology modelling toolbox. *PLOS Comp. Biol.* 17(1), e1008667 (2021). [DOI](#)
- Studer, G., Rempfer, C., Waterhouse, A.M., Gumienny, G., Haas, J., Schwede, T. QMEANDisCo - distance constraints applied on model quality estimation. *Bioinformatics* 36, 1765-1771 (2020). [DOI](#)
- Bertoni, M., Kiefer, F., Biasini, M., Bordoli, L., Schwede, T. Modeling protein quaternary structure of homo- and hetero-oligomers beyond binary interactions by homology. *Scientific Reports* 7 (2017). [DOI](#)

### Results

The SWISS-MODEL template library (SMTL version 2021-03-25, PDB release 2021-03-19) was searched with BLAST (Camacho et al.) and HHblits (Steinegger et al.) for evolutionary related structures matching the target sequence in Table T1. For details on the template search, see Materials and Methods. Overall 189 templates were found (Table T2).

### Models

The following model was built (see Materials and Methods "Model Building"):

| Model #01                                                                           | File | Built with    | Oligo-State                         | Ligands                                                                                                                                                         | GMQE | QMEAN |
|-------------------------------------------------------------------------------------|------|---------------|-------------------------------------|-----------------------------------------------------------------------------------------------------------------------------------------------------------------|------|-------|
|  | PDB  | ProMod3 3.2.0 | homo-tetramer (matching prediction) | 4 x CA: CALCIUM ION;<br>1 x NAG: 2-acetamido-2-deoxy-beta-D-glucopyranose;<br>1 x NAG-FUC: alpha-L-fucopyranose-(1-6)-2-acetamido-2-deoxy-beta-D-glucopyranose; | 0.95 | -1.40 |

|           |                                                                                     |       |
|-----------|-------------------------------------------------------------------------------------|-------|
| QMEAN     |  | -1.40 |
| C $\beta$ |  | -1.37 |
| All Atom  |  | -1.65 |
| solvation |  | -1.52 |
| torsion   |  | -0.61 |

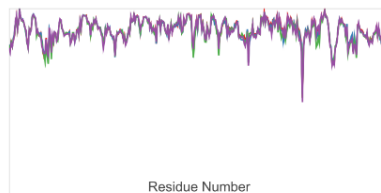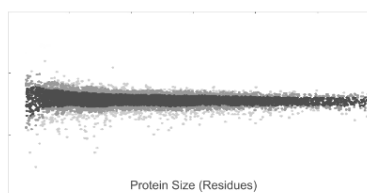

| Template | Seq Identity | Oligo-state   | QSQE | Found by | Method | Resolution | Seq Similarity | Range   | Coverage | Description   |
|----------|--------------|---------------|------|----------|--------|------------|----------------|---------|----------|---------------|
| 4gzs.1.A | 96.39        | homo-tetramer | 1.00 | HHblits  | X-ray  | 2.35Å      | 0.62           | 1 - 360 | 1.00     | Neuraminidase |

### Included Ligands

| Ligand      | Description                                                         |
|-------------|---------------------------------------------------------------------|
| 4 x CA      | CALCIUM ION                                                         |
| 1 x NAG     | 2-acetamido-2-deoxy-beta-D-glucopyranose                            |
| 1 x NAG-FUC | alpha-L-fucopyranose-(1-6)-2-acetamido-2-deoxy-beta-D-glucopyranose |

### Excluded ligands

| Ligand Name.Number    | Reason for Exclusion       | Description                                                                                                                                                                 |
|-----------------------|----------------------------|-----------------------------------------------------------------------------------------------------------------------------------------------------------------------------|
| CA.16                 | Not in contact with model. | CALCIUM ION                                                                                                                                                                 |
| EPE.10                | Not biologically relevant. | 4-(2-HYDROXYETHYL)-1-PIPERAZINE ETHANESULFONIC ACID                                                                                                                         |
| EPE.13                | Not biologically relevant. | 4-(2-HYDROXYETHYL)-1-PIPERAZINE ETHANESULFONIC ACID                                                                                                                         |
| EPE.18                | Not biologically relevant. | 4-(2-HYDROXYETHYL)-1-PIPERAZINE ETHANESULFONIC ACID                                                                                                                         |
| EPE.22                | Not biologically relevant. | 4-(2-HYDROXYETHYL)-1-PIPERAZINE ETHANESULFONIC ACID                                                                                                                         |
| NAG.11                | Clashing with protein.     | 2-acetamido-2-deoxy-beta-D-glucopyranose                                                                                                                                    |
| NAG.14                | Clashing with protein.     | 2-acetamido-2-deoxy-beta-D-glucopyranose                                                                                                                                    |
| NAG.15                | Clashing with protein.     | 2-acetamido-2-deoxy-beta-D-glucopyranose                                                                                                                                    |
| NAG.19                | Clashing with protein.     | 2-acetamido-2-deoxy-beta-D-glucopyranose                                                                                                                                    |
| NAG.20                | Not in contact with model. | 2-acetamido-2-deoxy-beta-D-glucopyranose                                                                                                                                    |
| NAG.24                | Clashing with protein.     | 2-acetamido-2-deoxy-beta-D-glucopyranose                                                                                                                                    |
| NAG-FUC.2             | Clashing with protein.     | alpha-L-fucopyranose-(1-6)-2-acetamido-2-deoxy-beta-D-glucopyranose                                                                                                         |
| NAG-FUC.4             | Clashing with protein.     | alpha-L-fucopyranose-(1-6)-2-acetamido-2-deoxy-beta-D-glucopyranose                                                                                                         |
| NAG-NAG.8             | Not in contact with model. | 2-acetamido-2-deoxy-beta-D-glucopyranose-(1-4)-2-acetamido-2-deoxy-beta-D-glucopyranose                                                                                     |
| NAG-NAG-BMA-MAN-MAN.1 | Clashing with protein.     | alpha-D-mannopyranose-(1-3)-[alpha-D-mannopyranose-(1-6)]beta-D-mannopyranose-(1-4)-2-acetamido-2-deoxy-beta-D-glucopyranose-(1-4)-2-acetamido-2-deoxy-beta-D-glucopyranose |
| NAG-NAG-BMA-MAN-MAN.3 | Clashing with protein.     | alpha-D-mannopyranose-(1-3)-[alpha-D-mannopyranose-(1-6)]beta-D-mannopyranose-(1-4)-2-acetamido-2-deoxy-beta-D-glucopyranose-(1-4)-2-acetamido-2-deoxy-beta-D-glucopyranose |
| NAG-NAG-BMA-MAN-MAN.5 | Clashing with protein.     | alpha-D-mannopyranose-(1-3)-[alpha-D-mannopyranose-(1-6)]beta-D-mannopyranose-(1-4)-2-acetamido-2-deoxy-beta-D-glucopyranose-(1-4)-2-acetamido-2-deoxy-beta-D-glucopyranose |
| NAG-NAG-BMA-MAN-MAN.7 | Not biologically relevant. | alpha-D-mannopyranose-(1-3)-[alpha-D-mannopyranose-(1-6)]beta-D-mannopyranose-(1-4)-2-acetamido-2-deoxy-beta-D-glucopyranose-(1-4)-2-acetamido-2-deoxy-beta-D-glucopyranose |

Target AGGDIWVTRPEYVSCDPDKGNQFALGQGTTLKSGHSNNTVDRTPYRLLMNELGVPFHLGKQVCIAWSSSSCHDGKAW  
 4gzs.1.A AGGDIWVTRPEYVSCDPDKCYQFALGQGTTLNNVHSNNTVGRTPYRLLMNELGVPFHLGKQVCIAWSSSSCHDGKAW

Target LHCITGDDKNATASFYINGRLVDSVVSWSKEVLRTQESECVCINGTCTVMTDGSASGKADTKILFIEEGKIVHTSTLS  
 4gzs.1.A LHCITGDDKNATASFYINGRLVDSVVSWSKEILRTQESECVCINGTCTVMTDGSASGKADTKILFIEEGKIVHTSTLS

Target GSAQHVEECSCYPRYPGVRVCRDNWKGSNRPIDINIKDHSIVSSVYCSGLVGDTPRKNDSSSSHCLPNNEEGGHV  
 4gzs.1.A GSAQHVEECSCYPRYPGVRVCRDNWKGSNRPIDINIKDHSIVSSVYCSGLVGDTPRKNDSSSSHCLDPNNEEGGHV

Target KGWAFDDGNDVWMGRTINETSRLGYETFVKVIEGWSNPKSKLQINRQVIVDRGDRSGYSGIFSVEGKSCINRCFYVELIRG  
 4gzs.1.A KGWAFDDGNDVWMGRTINETSRLGYETFVKVIEGWSNPKSKLQINRQVIVDRGNRSGYSGIFSVEGKSCINRCFYVELIRG

Target RKEETEVLWTSNSILLFCGTSYGTGSWPDAADLNLMPI  
 4gzs.1.A RKEETEVLWTSNSIVVFCGTSYGTGSWPDAADLNLMPI

Target AGGDIWVTREPYVSCDPDKGNQFALGQGTTLKSGHSNNTVRDRTPYRLLMNELGVPFHLGKQVCIWSSSSCHDGKAW  
4gzs.1.B AGGDIWVTREPYVSCDPDKCYQFALGQGTTLNNVHSNNTVRGRTPYRLLMNELGVPFHLGKQVCIWSSSSCHDGKAW

Target LHCITGDDKNATASFYINGRLVDSVVSWSKEVLRTQESECVCTVVMTDGSASGKADTKILFIEEGKIVHTSTLS  
4gzs.1.B LHCITGDDKNATASFYINGRLVDSVVSWSKEILRTQESECVCTVVMTDGSASGKADTKILFIEEGKIVHTSTLS

Target GSAQHVEECSCYPRYPGVRVCVCRDNWKGSNRPIDINIKDHSIVSSVYVCSGLVGDTPRKNDSSSSGHCLNPNEEGGHV  
4gzs.1.B GSAQHVEECSCYPRYPGVRVCVCRDNWKGSNRPIDINIKDHSIVSSVYVCSGLVGDTPRKNDSSSSHCLDPNNEEGGHV

Target KGWAFDDGNDVWMGRINETSRLGYETFKVIEGWSNPKSKLQINRQVIVDRGDRSGYSGIFSVGKSCINRCFYVELIRG  
4gzs.1.B KGWAFDDGNDVWMGRINETSRLGYETFKVIEGWSNPKSKLQINRQVIVDRGNRSGYSGIFSVGKSCINRCFYVELIRG

Target RKEETEVLWTSNSILLFCGTSPTYGTGSPDAADLNLMP  
4gzs.1.B RKEETEVLWTSNSIVVFCGTSPTYGTGSPDGADLNLMP

Target AGGDIWVTREPYVSCDPDKGNQFALGQGTTLKSGHSNNTVRDRTPYRLLMNELGVPFHLGKQVCIWSSSSCHDGKAW  
4gzs.1.C AGGDIWVTREPYVSCDPDKCYQFALGQGTTLNNVHSNNTVRGRTPYRLLMNELGVPFHLGKQVCIWSSSSCHDGKAW

Target LHCITGDDKNATASFYINGRLVDSVVSWSKEVLRTQESECVCTVVMTDGSASGKADTKILFIEEGKIVHTSTLS  
4gzs.1.C LHCITGDDKNATASFYINGRLVDSVVSWSKEILRTQESECVCTVVMTDGSASGKADTKILFIEEGKIVHTSTLS

Target GSAQHVEECSCYPRYPGVRVCVCRDNWKGSNRPIDINIKDHSIVSSVYVCSGLVGDTPRKNDSSSSGHCLNPNEEGGHV  
4gzs.1.C GSAQHVEECSCYPRYPGVRVCVCRDNWKGSNRPIDINIKDHSIVSSVYVCSGLVGDTPRKNDSSSSHCLDPNNEEGGHV

Target KGWAFDDGNDVWMGRINETSRLGYETFKVIEGWSNPKSKLQINRQVIVDRGDRSGYSGIFSVGKSCINRCFYVELIRG  
4gzs.1.C KGWAFDDGNDVWMGRINETSRLGYETFKVIEGWSNPKSKLQINRQVIVDRGNRSGYSGIFSVGKSCINRCFYVELIRG

Target RKEETEVLWTSNSILLFCGTSPTYGTGSPDAADLNLMP  
4gzs.1.C RKEETEVLWTSNSIVVFCGTSPTYGTGSPDGADLNLMP

Target AGGDIWVTREPYVSCDPDKGNQFALGQGTTLKSGHSNNTVRDRTPYRLLMNELGVPFHLGKQVCIWSSSSCHDGKAW  
4gzs.1.D AGGDIWVTREPYVSCDPDKCYQFALGQGTTLNNVHSNNTVRGRTPYRLLMNELGVPFHLGKQVCIWSSSSCHDGKAW

Target LHCITGDDKNATASFYINGRLVDSVVSWSKEVLRTQESECVCTVVMTDGSASGKADTKILFIEEGKIVHTSTLS  
4gzs.1.D LHCITGDDKNATASFYINGRLVDSVVSWSKEILRTQESECVCTVVMTDGSASGKADTKILFIEEGKIVHTSTLS

Target GSAQHVEECSCYPRYPGVRVCVCRDNWKGSNRPIDINIKDHSIVSSVYVCSGLVGDTPRKNDSSSSGHCLNPNEEGGHV  
4gzs.1.D GSAQHVEECSCYPRYPGVRVCVCRDNWKGSNRPIDINIKDHSIVSSVYVCSGLVGDTPRKNDSSSSHCLDPNNEEGGHV

Target KGWAFDDGNDVWMGRINETSRLGYETFKVIEGWSNPKSKLQINRQVIVDRGDRSGYSGIFSVGKSCINRCFYVELIRG  
4gzs.1.D KGWAFDDGNDVWMGRINETSRLGYETFKVIEGWSNPKSKLQINRQVIVDRGNRSGYSGIFSVGKSCINRCFYVELIRG

Target RKEETEVLWTSNSILLFCGTSPTYGTGSPDAADLNLMP  
4gzs.1.D RKEETEVLWTSNSIVVFCGTSPTYGTGSPDGADLNLMP

---

## Materials and Methods

### Template Search

Template search with BLAST and HHblits has been performed against the SWISS-MODEL template library (SMTL, last update: 2021-03-25, last included PDB release: 2021-03-19).

The target sequence was searched with BLAST against the primary amino acid sequence contained in the SMTL. A total of 103 templates were found.

458

459



An initial HHblits profile has been built using the procedure outlined in (Steinegger et al.), followed by 1 iteration of HHblits against Uniclust30 (Mirdita, von den Driesch et al.). The obtained profile has then be searched against all profiles of the SMTL. A total of 104 templates were found.

## Template Selection

For each identified template, the template's quality has been predicted from features of the target-template alignment. The templates with the highest quality have then been selected for model building.

## Model Building

Models are built based on the target-template alignment using ProMod3 (Studer et al.). Coordinates which are conserved between the target and the template are copied from the template to the model. Insertions and deletions are remodelled using a fragment library. Side chains are then rebuilt. Finally, the geometry of the resulting model is regularized by using a force field.

## Model Quality Estimation

The global and per-residue model quality has been assessed using the QMEAN scoring function (Studer et al.).

## Ligand Modelling

Ligands present in the template structure are transferred by homology to the model when the following criteria are met: (a) The ligands are annotated as biologically relevant in the template library, (b) the ligand is in contact with the model, (c) the ligand is not clashing with the protein, (d) the residues in contact with the ligand are conserved between the target and the template. If any of these four criteria is not satisfied, a certain ligand will not be included in the model. The model summary includes information on why and which ligand has not been included.

## Oligomeric State Conservation

The quaternary structure annotation of the template is used to model the target sequence in its oligomeric form. The method (Bertoni et al.) is based on a supervised machine learning algorithm, Support Vector Machines (SVM), which combines interface conservation, structural clustering, and other template features to provide a quaternary structure quality estimate (QSQE). The QSQE score is a number between 0 and 1, reflecting the expected accuracy of the interchain contacts for a model built based a given alignment and template. Higher numbers indicate higher reliability. This complements the GMQE score which estimates the accuracy of the tertiary structure of the resulting model.

## References

- **BLAST**  
Camacho, C., Coulouris, G., Avagyan, V., Ma, N., Papadopoulos, J., Bealer, K., Madden, T.L. BLAST+: architecture and applications. *BMC Bioinformatics* 10, 421-430 (2009). [doi>](#)
- **HHblits**  
Steinegger, M., Meier, M., Mirdita, M., Vöhringer, H., Haunsberger, S. J., Söding, J. HH-suite3 for fast remote homology detection and deep protein annotation. *BMC Bioinformatics* 20, 473 (2019). [doi>](#)
- **Uniclust30**  
Mirdita, M., von den Driesch, L., Galiez, C., Martin, M.J., Söding, J., Steinegger, M. Uniclust databases of clustered and deeply annotated protein sequences and alignments. *Nucleic Acids Research* 45, D170–D176 (2016). [doi>](#)

## Table T1:

Primary amino acid sequence for which templates were searched and models were built.

```
AGGDIWVTREPYVSCDPDKGNQFALGQGTTLKSGHSNNTVRDRTPYRLLMNELGVPFHLGTRKQVCIAWSSSSCHDGKAWLHVCITGDDKNATASFIYNG  
RLVDSVVSWSKEVLRTESECVCTVVMVDGSASGKADTKILFIEEGKIVHTSTLSGSAQHVEECYPRYPGVRCVCRDNWKGSNRPIVDINIKD  
HSIVSSYVCSGLVGDTPFRKNDSSSGHCLNPNNEEGHGVKGFDDGNDVVMGRTINETSRLGYETFKVIEGWSNPKSKLQINRQVIVDRGDRSGYSGI  
FSVEGKSCINRCFYVELIRGRKEETEVLWTSNSILLFCGTSGTYGTGSWPDAADLNLMPI
```

## Table T2:

| Template | Seq Identity | Oligo-state   | QSQE | Found by | Method | Resolution | Seq Similarity | Coverage | Description   |
|----------|--------------|---------------|------|----------|--------|------------|----------------|----------|---------------|
| 4gzs.1.A | 96.39        | homo-tetramer | 1.00 | HHblits  | X-ray  | 2.35Å      | 0.62           | 1.00     | Neuraminidase |
| 4gzo.1.A | 96.67        | homo-tetramer | 1.00 | HHblits  | X-ray  | 2.60Å      | 0.62           | 1.00     | neuraminidase |

460

461

| Template | Seq Identity | Oligo-state   | QSQE | Found by | Method | Resolution | Seq Similarity | Coverage | Description                          |
|----------|--------------|---------------|------|----------|--------|------------|----------------|----------|--------------------------------------|
| 3tia.1.A | 82.78        | homo-tetramer | 1.00 | HHblits  | X-ray  | 1.80Å      | 0.57           | 1.00     | Neuraminidase                        |
| 4k1j.1.A | 82.78        | homo-tetramer | 1.00 | HHblits  | X-ray  | 2.20Å      | 0.57           | 1.00     | Neuraminidase                        |
| 4h52.1.A | 82.78        | homo-tetramer | 1.00 | HHblits  | X-ray  | 1.80Å      | 0.57           | 1.00     | Neuraminidase                        |
| 5huk.1.A | 79.72        | homo-tetramer | 1.00 | HHblits  | X-ray  | 2.45Å      | 0.57           | 1.00     | Neuraminidase                        |
| 6n4d.1.A | 79.17        | homo-tetramer | 1.00 | HHblits  | X-ray  | 1.80Å      | 0.56           | 1.00     | Neuraminidase                        |
| 2bat.1.A | 83.06        | homo-tetramer | 1.00 | HHblits  | X-ray  | 2.00Å      | 0.57           | 1.00     | NEURAMINIDASE N2                     |
| 1ivg.1.A | 82.78        | homo-tetramer | 1.00 | HHblits  | X-ray  | 1.90Å      | 0.57           | 1.00     | INFLUENZA A SUBTYPE N2 NEURAMINIDASE |
| 1ive.1.A | 82.78        | homo-tetramer | 1.00 | HHblits  | X-ray  | 2.40Å      | 0.57           | 1.00     | INFLUENZA A SUBTYPE N2 NEURAMINIDASE |
| 1inh.1.A | 82.78        | homo-tetramer | 1.00 | HHblits  | X-ray  | 2.40Å      | 0.57           | 1.00     | INFLUENZA A SUBTYPE N2 NEURAMINIDASE |
| 1ing.1.A | 82.78        | homo-tetramer | 1.00 | HHblits  | X-ray  | 2.40Å      | 0.57           | 1.00     | INFLUENZA A SUBTYPE N2 NEURAMINIDASE |
| 6br5.1.A | 95.83        | monomer       | -    | HHblits  | X-ray  | 2.04Å      | 0.62           | 1.00     | Neuraminidase                        |
| 2aep.1.A | 90.56        | homo-tetramer | 1.00 | HHblits  | X-ray  | 2.10Å      | 0.60           | 1.00     | neuraminidase                        |
| 6n6b.1.A | 89.17        | homo-tetramer | 1.00 | HHblits  | X-ray  | 2.30Å      | 0.60           | 1.00     | Neuraminidase                        |
| 4mwx.1.B | 47.62        | homo-tetramer | 0.86 | HHblits  | X-ray  | 1.80Å      | 0.44           | 0.99     | Neuraminidase                        |
| 4mwj.1.A | 47.90        | homo-tetramer | 0.85 | HHblits  | X-ray  | 1.80Å      | 0.44           | 0.99     | Neuraminidase                        |
| 5nz4.1.A | 46.05        | homo-tetramer | 0.88 | HHblits  | X-ray  | 1.36Å      | 0.43           | 0.98     | neuraminidase                        |
| 2b8h.1.A | 47.62        | homo-tetramer | 0.85 | HHblits  | X-ray  | 2.20Å      | 0.44           | 0.99     | Neuraminidase                        |
| 4m3m.1.A | 44.94        | homo-tetramer | 0.87 | HHblits  | X-ray  | 2.10Å      | 0.43           | 0.99     | Neuraminidase                        |
| 5l14.1.A | 47.90        | homo-tetramer | 0.84 | HHblits  | X-ray  | 1.90Å      | 0.44           | 0.99     | Neuraminidase                        |
| 4mwj.1.A | 49.72        | homo-tetramer | 0.84 | BLAST    | X-ray  | 1.80Å      | 0.45           | 0.98     | Neuraminidase                        |
| 2b8h.1.A | 49.43        | homo-tetramer | 0.84 | BLAST    | X-ray  | 2.20Å      | 0.45           | 0.98     | Neuraminidase                        |
| 1nna.1.D | 49.15        | homo-tetramer | 0.84 | BLAST    | X-ray  | 2.50Å      | 0.44           | 0.98     | NEURAMINIDASE                        |
| 4mju.1.A | 45.51        | homo-tetramer | 0.84 | HHblits  | X-ray  | 2.35Å      | 0.43           | 0.99     | Neuraminidase                        |
| 4nn9.1.A | 49.15        | homo-tetramer | 0.83 | BLAST    | X-ray  | 2.30Å      | 0.44           | 0.98     | NEURAMINIDASE N9                     |
| 1mwe.1.C | 49.15        | homo-tetramer | 0.83 | BLAST    | X-ray  | 1.70Å      | 0.44           | 0.98     | NEURAMINIDASE                        |
| 6pzw.1.A | 47.90        | homo-tetramer | 0.87 | HHblits  | EM     | NA         | 0.44           | 0.99     | Neuraminidase                        |
| 6pze.1.A | 47.90        | homo-tetramer | 0.83 | HHblits  | X-ray  | 2.30Å      | 0.44           | 0.99     | Neuraminidase                        |
| 6pze.1.A | 49.72        | homo-tetramer | 0.83 | BLAST    | X-ray  | 2.30Å      | 0.45           | 0.98     | Neuraminidase                        |

462

463



464

| Template | Seq Identity | Oligo-state   | QSQE | Found by | Method | Resolution | Seq Similarity | Coverage | Description                          |
|----------|--------------|---------------|------|----------|--------|------------|----------------|----------|--------------------------------------|
| 6pzf.1.A | 47.90        | homo-tetramer | 0.84 | HHblits  | X-ray  | 2.80Å      | 0.44           | 0.99     | Neuraminidase                        |
| 1nca.2.C | 49.15        | homo-tetramer | 0.84 | BLAST    | X-ray  | 2.50Å      | 0.44           | 0.98     | INFLUENZA A SUBTYPE N9 NEURAMINIDASE |
| 1ncd.1.A | 47.90        | homo-tetramer | 0.84 | HHblits  | X-ray  | 2.90Å      | 0.44           | 0.99     | INFLUENZA A SUBTYPE N9 NEURAMINIDASE |
| 1nmb.1.A | 47.90        | homo-tetramer | 0.81 | HHblits  | X-ray  | 2.20Å      | 0.44           | 0.99     | N9 NEURAMINIDASE                     |
| 4d8s.1.A | 45.79        | homo-tetramer | 0.88 | HHblits  | X-ray  | 2.40Å      | 0.43           | 0.99     | Neuraminidase                        |
| 4gb1.1.A | 45.79        | homo-tetramer | 0.85 | HHblits  | X-ray  | 2.62Å      | 0.43           | 0.99     | Neuraminidase                        |
| 4b7q.1.A | 46.18        | homo-tetramer | 0.85 | HHblits  | X-ray  | 2.73Å      | 0.43           | 0.98     | NEURAMINIDASE                        |
| 3o9j.1.A | 45.92        | homo-tetramer | 0.84 | HHblits  | X-ray  | 2.00Å      | 0.43           | 0.99     | Neuraminidase                        |
| 4mjv.1.A | 45.79        | homo-tetramer | 0.83 | HHblits  | X-ray  | 2.65Å      | 0.43           | 0.99     | Neuraminidase                        |
| 2ht7.1.A | 45.51        | homo-tetramer | 0.81 | HHblits  | X-ray  | 2.60Å      | 0.43           | 0.99     | Neuraminidase                        |
| 4ks5.1.A | 44.94        | homo-tetramer | 0.77 | HHblits  | X-ray  | 2.70Å      | 0.43           | 0.99     | Neuraminidase                        |
| 6crd.1.D | 49.15        | homo-tetramer | 0.75 | BLAST    | X-ray  | 2.57Å      | 0.44           | 0.98     | Tetrabrachion,Neuraminidase          |
| 6crd.1.B | 49.15        | homo-tetramer | 0.75 | BLAST    | X-ray  | 2.57Å      | 0.44           | 0.98     | Tetrabrachion,Neuraminidase          |
| 6crd.1.C | 49.15        | homo-tetramer | 0.75 | BLAST    | X-ray  | 2.57Å      | 0.44           | 0.98     | Tetrabrachion,Neuraminidase          |
| 1ncc.1.A | 49.15        | homo-tetramer | 0.86 | BLAST    | X-ray  | 2.50Å      | 0.44           | 0.98     | INFLUENZA A SUBTYPE N9 NEURAMINIDASE |
| 1ncd.1.A | 49.43        | homo-tetramer | 0.83 | BLAST    | X-ray  | 2.90Å      | 0.45           | 0.98     | INFLUENZA A SUBTYPE N9 NEURAMINIDASE |
| 1nmb.1.A | 49.43        | homo-tetramer | 0.81 | BLAST    | X-ray  | 2.20Å      | 0.45           | 0.98     | N9 NEURAMINIDASE                     |
| 6lxx.1.A | 48.13        | homo-tetramer | 0.84 | BLAST    | X-ray  | 3.61Å      | 0.44           | 0.96     | Neuraminidase                        |
| 1nma.1.A | 47.62        | homo-tetramer | 0.68 | HHblits  | X-ray  | 3.00Å      | 0.44           | 0.99     | N9 NEURAMINIDASE                     |
| 1nma.1.A | 49.43        | homo-tetramer | 0.65 | BLAST    | X-ray  | 3.00Å      | 0.45           | 0.98     | N9 NEURAMINIDASE                     |

The table above shows the top 50 filtered templates. A further 83 templates were found which were considered to be less suitable for modelling than the filtered list.

1a4g.1.A, 1b9v.1.D, 1inf.1.A, 1iny.1.A, 1l7g.1.A, 1mwe.1.C, 1nca.2.C, 1ncb.1.A, 1ncc.1.A, 1nna.1.D, 1vcj.1.A, 2ht7.1.A, 2htv.1.A, 2hu0.1.A, 2qwd.1.A, 3b7e.1.A, 3cl0.1.A, 3cl2.1.A, 3cye.1.A, 3f14.1.A, 3k36.1.A, 3k38.1.A, 3nn9.1.A, 3o9j.1.A, 3sal.1.A, 4b7m.1.C, 4b7q.1.A, 4b7r.1.A, 4cpl.1.A, 4cpo.1.A, 4d8s.1.A, 4fvk.1.A, 4gb1.1.A, 4gdi.1.A, 4gdi.1.B, 4gdj.1.A, 4gez.1.A, 4h53.1.A, 4h53.1.D, 4hzv.1.A, 4hzy.1.A, 4hzz.1.A, 4k3y.1.A, 4k3y.1.C, 4ks5.1.A, 4m3m.1.A, 4mc7.1.A, 4mju.1.A, 4mjv.1.A, 4mwx.1.B, 4nn9.1.A, 4qn3.1.A, 4qn4.1.A, 4qnp.1.A, 4wa5.1.D, 5hug.1.A, 5hum.1.A, 5hun.1.A, 5l14.1.A, 5nn9.1.A, 5nwe.1.A, 5nz4.1.A, 5nze.1.A, 5nzf.1.A, 5nzn.1.A, 6crd.1.A, 6crd.1.B, 6crd.1.C, 6crd.1.D, 6d96.1.A, 6g01.2.D, 6hfy.1.D, 6hp0.1.C, 6lxi.1.A, 6lxx.1.A, 6nn9.1.A, 6pzf.1.A, 6pzw.1.A, 6q20.1.A, 6q23.1.A, 6v4n.1.A, 6v4o.1.A, 7cm1.1.A

465

466 **Table S1 | Potential “original” epitopes targeted by αEp9 Abs**

| Construct #                       | Pathogen                                                    | Target protein                       | Accession No.  | Residues  | Epitope sequences                         | Similarity %<br>template: Ep9<br>or EpNeu |
|-----------------------------------|-------------------------------------------------------------|--------------------------------------|----------------|-----------|-------------------------------------------|-------------------------------------------|
| <b>Phage-displayed constructs</b> |                                                             |                                      |                |           |                                           |                                           |
| 1                                 | SARS-COV-2 (Ep9)                                            | Nucleocapsid                         | QQX29443.1     | 152-172   | ANNAIVLQLPQGTTLPKGFY                      | -                                         |
| 2                                 | SARS-COV-1                                                  | Nucleocapsid                         | YP_009825061.1 | 153-173   | NNNAATVQLPQGTTLPKGFY                      | 90.5                                      |
| 3                                 | MERS                                                        | Nucleocapsid                         | YP_009047211.1 | 141-151   | NNNSAIVTQFAPGKTLPKNFH                     | 66.7                                      |
| 4                                 | Human coronavirus HKU1                                      | Nucleocapsid                         | YP_173242.1    | 166-186   | TTQEAIPTRFPPGTILPQGY                      | 57.1                                      |
| 5                                 | Human coronavirus NL63                                      | Nucleocapsid                         | YP_003771.1    | 119-136   | NQKPLEPKFSIALPPELS                        | 13.8                                      |
| 6                                 | Human coronavirus OC43                                      | Nucleocapsid                         | YP_009555245.1 | 167-187   | SSDEAIPTRFPPGTVLPQGY                      | 71.4                                      |
| 7                                 | Human coronavirus 229E                                      | Nucleocapsid                         | AGW80953.1     | 122-138   | SEPEIPHFNQKLPNGVT                         | 21.4                                      |
| 8                                 | Human adenovirus 61                                         | Hexon                                | AQQ81927.1     | 123-164   | ANNAATPQVVFYTEDVNLEMPDTHLVFKPAVPNGTIASESL | 17.6                                      |
| 9                                 | Human mastadenovirus E                                      | PVIII                                | YP_068038.1    | 76-114    | AALVYQEIPQPTTVLLPRDAQAEVQLTNSGVQLAGGATL   | 31                                        |
| 10                                | Influenza A virus (A/Utah/40/2017)                          | PB2 polymerase                       | AVH77902.1     | 225-244   | GSVYIEVLHLTQGTCEWQMY                      | 41.7                                      |
| 11                                | Influenza A virus (EpNeu)<br>(A/Para/128982-IEC/2014(H3N2)) | Neuraminidase, partial               | AIX95025.1     | 34-46     | ALGQGTTLKSGHS                             | 38.1                                      |
| 12                                | Influenza B virus<br>(B/California/88/2019)                 | Neuraminidase                        | QIA55965.1     | 67-79     | ATKGVVLLLPEPE                             | 28.6                                      |
| 13                                | Influenza C virus<br>(C/Singapore/DSO-070193/2006)          | Polymerase PB1, partial              | AFV68302.1     | 119-145   | AATALQLTVDAIKETEGPFKGTMMLEY               | 34.4                                      |
| 14                                | Human respiratory syncytial virus A                         | Fusion protein                       | ASU44644.1     | 87-100    | NNAVTELQLLMQST                            | 38.1                                      |
| 15                                | Human respiratory syncytial virus A                         | Attachment glycoprotein              | ART28426.1     | 106-116   | GTPQSTTIPA                                | 28.6                                      |
| 16                                | Human metapneumovirus                                       | Nucleoprotein, partial               | ABO15448.1     | 11-33     | TTTAVTPSSLPQEITLLCGEILY                   | 34.8                                      |
| 17                                | Human metapneumovirus                                       | Attachment glycoprotein,<br>partial  | AEW90340.1     | 57-72     | PQQTDDKHTALPKSIY                          | 30.8                                      |
| 18                                | Human betaherpesvirus 6A                                    | Immediate Early protein 2            | AGJ52064.1     | 1396-1422 | AATPIDFVGAVKTCNKYAKDNPKEIVL               | 10                                        |
| 19                                | Verrucomicrobia bacterium                                   | NADH-quinone<br>oxidoreductase (NOX) | PYJ45937.1     | 76-89     | AGVVLQLPQGTTL                             | 57.1                                      |

467

468

|                               |                                                                                           |                                                                                                        |                       |                   |                         |      |
|-------------------------------|-------------------------------------------------------------------------------------------|--------------------------------------------------------------------------------------------------------|-----------------------|-------------------|-------------------------|------|
| 20                            | <i>Clostridium butyricum</i>                                                              | Bifunctional methylenetetrahydrofolate dehydrogenase/methylenetetrahydrofolate cyclohydrolase (MTHFD2) | MBE6063617.1          | 94-104            | IILQLPLPKKF             | 47.6 |
| 21                            | <i>Fusobacterium mortiferum</i>                                                           | Type II secretion protein                                                                              | WP_118233983.1        | 77-99             | VENGAVLQYDKEIYLGLTENFF  | 48   |
| 22                            | <i>Fusobacterium mortiferum</i>                                                           | Autotransporter outer membrane protein                                                                 | WP_005886362.1        | 449-460           | NGAIVGDLVQGT            | 38.1 |
| 23                            | Influenza A virus (A/swine/Missouri/A01774733/2016(H1N2) or A/Para/129501-IEC/2014(H3N2)) | Neuraminidase                                                                                          | ANK78229.1 / AIX95013 | 133-145/<br>24-36 | ALGQGTTLNNGHS           | 92.3 |
| 24                            | Influenza A virus (A/swine/Minnesota/A01394278/2013(H3N2))                                | Neuraminidase                                                                                          | AHA57095.1            | 134-146           | ALGQGTTLNNGHS           | 92.3 |
| 25                            | Influenza A virus (A/California/04/2009 (H1N1))                                           | Neuraminidase                                                                                          | AJ176397.1            | 75-89             | TFFLTQGALLNDKHS         | 46.7 |
| 26                            | Influenza A virus (A/California/111/2015(H3N2))                                           | Neuraminidase                                                                                          | ANM97445.1            | 133-145           | ALGQGTTLNNGHS           | 84.6 |
| 27                            | Influenza A virus (A/mallard/California/1156/2010(H4N6))                                  | Neuraminidase                                                                                          | AEK50939.1            | 133-142           | ALSQGTTLKKG             | 84.6 |
| 28                            | Influenza A virus (A/California/33/2011(H3N2))                                            | Neuraminidase                                                                                          | AGL06761.1            | 133-145           | ALGQGTTLNNGHS           | 84.6 |
| 29                            | Influenza A virus (EpNeu Pred) (A/Para/128982-IEC/2014(H3N2))                             | Neuraminidase, partial                                                                                 | AIX95025.1            | 34-56             | ALGQGTTLNNGHSNNTVRDRTPY | -    |
| <b>eGFP-fusion constructs</b> |                                                                                           |                                                                                                        |                       |                   |                         |      |
| 30                            | Influenza A virus (EpNeu) (A/Para/128982-IEC/2014(H3N2))                                  | Neuraminidase                                                                                          | AIX95025.1            | 34-46             | ALGQGTTLNNGHS           | -    |
| 31                            | Influenza A virus (EpNeu Pred) (A/Para/128982-IEC/2014(H3N2))                             | Neuraminidase                                                                                          | AIX95025.1            | 34-56             | ALGQGTTLNNGHSNNTVRDRTPY | -    |

470 **Table S2 | Primers used to subclone potential original epitopes**

| Construct #                       | Primer names:                 | Oligonucleotide sequence                                                                  |
|-----------------------------------|-------------------------------|-------------------------------------------------------------------------------------------|
| <b>Phage-displayed constructs</b> |                               |                                                                                           |
| 1                                 | primer_1_F                    | tcaagggaactacctgccaagggttctatGGTGGAGGATCCGGGAGC                                           |
|                                   | primer_1_R                    | gglaattgtaacacgattgcagcgttattagcTCCACTTCCTTTATCATCGTCATCTTTATAATC                         |
|                                   | primer_2_F                    | actccacagggaaacgacactgccaaggattGGTGGAGGATCCGGGAGC                                         |
| 2                                 | primer_2_R                    | tgcaatcagtgccagcattgtattccactccTTTATCATCGTCATCTTTATAATCAACCAATGC                          |
|                                   | primer_3_F                    | tccgggtacaaagttaccaagaactccacGGTGGAGGATCCGGGAGC                                           |
| 3                                 | primer_3_R                    | gcaaatgaglaactatcgctgaatcattgtTCCACTTCCTTTATCATCGTCATCTTTATAATC                           |
|                                   | primer_4_F                    | tcccgaactatltttaccacaggatactGGTGGAGGATCCGGGAGC                                            |
| 4                                 | primer_4_R                    | gggaactagtggaatcgctcctcagtagtTCCACTTCCTTTATCATCGTCATCTTTATAATC                            |
|                                   | primer_5_F                    | agtattgccttgccacctgattatctGGTGGAGGATCCGGGAGC                                              |
| 5                                 | primer_5_R                    | aaatttcggttcaagcggctttgattTCCACTTCCTTTATCATCGTCATCTTTATAATC                               |
|                                   | primer_6_F                    | tccgggtactgtttgctcagggttactacGGTGGAGGATCCGGGAGC                                           |
| 6                                 | primer_6_R                    | ggaaaccgcgtgggatggcctcaccagagctTTTATCATCGTCATCTTTATAATCAACCAATGC                          |
|                                   | primer_7_F                    | ccagaattgccgaacggcgttactGGTGGAGGATCCGGGAGC                                                |
| 7                                 | primer_7_R                    | ttaaagtgaggatcctggctcgtTTTATCATCGTCATCTTTATAATCAACCAATGC                                  |
|                                   | primer_8_F                    | TTCTAAATTCACATCCTCAGTATAGAACACGACTTGTGGGGTTGCTGCATTGTGGCTTTATCATCGTCATCTTTATAATCAACCAATGC |
| 8                                 | primer_8_R                    | ATGCCAGATACTCATTTGGTCTTCAAACCTGCCGTCGGAATGGCAGGATTGCTAGTGAATCTCTCCTCgggtggaggatccgggagc   |
|                                   | primer_9_F                    | ACGCGGAGCAGCACTGTAGTCGGCTGAGGGATTCTCTGGTACACCAGGGCGGCTTTATCATCGTCATCTTTATAATCAACCAATGC    |
| 9                                 | primer_9_R                    | GACGCGCAAGCCGAGGTCAGTTGACAAACAGCGGTGTACAATTGGCTGGCGGTGCCACTCTgggtggaggatccgggagc          |
|                                   | primer_10_F                   | acacaaggcacttgctgggacaaatglatGGTGGAGGATCCGGGAGC                                           |
| 10                                | primer_10_R                   | gagggtcagcacttcaatatagactgacctTTTATCATCGTCATCTTTATAATCAACCAATGC                           |
|                                   | primer_11_F                   | gcttctaagggccacagcGGTGGAGGATCCGGGAGC                                                      |
| 11                                | primer_11_R                   | gtggctcctggccaatgcTTTATCATCGTCATCTTTATAATCAACCAATGC                                       |
|                                   | primer_12_F                   | gctgctccgagccaagagGGTGGAGGATCCGGGAGC                                                      |
| 12                                | primer_12_R                   | agcacgacgcttctgtagcTTTATCATCGTCATCTTTATAATCAACCAATGC                                      |
|                                   | primer_13_F                   | gactgaaggtcctttaaaggccagacaatgttgaatGGTGGAGGATCCGGGAGC                                    |
| 13                                | primer_13_R                   | tcttaagtcatcagcagccttaagtgagagccgtcgtcTTTATCATCGTCATCTTTATAATCAACCAATGC                   |
|                                   | primer_14_F                   | caactcctcatgactctacaGGTGGAGGATCCGGGAGC                                                    |
| 14                                | primer_14_R                   | aagttctgtgacagcattgtTTTATCATCGTCATCTTTATAATCAACCAATGC                                     |
|                                   | primer_15_F                   | gacaaccatcctgcaGGTGGAGGATCCGGGAGC                                                         |
| 15                                | primer_15_R                   | gattgagcgtatgccTTTATCATCGTCATCTTTATAATCAACCAATGC                                          |
|                                   | primer_16_F                   | ggaaatcactccttgctggcgaatcttatGGTGGAGGATCCGGGAGC                                           |
| 16                                | primer_16_R                   | tgccgagcgtagatggcgttaactgcccgtagtagTTTATCATCGTCATCTTTATAATCAACCAATGC                      |
|                                   | primer_17_F                   | acggcactccgaagtccatctacGGTGGAGGATCCGGGAGC                                                 |
| 17                                | primer_17_R                   | atgcttgcagtgctgtgtggTTTATCATCGTCATCTTTATAATCAACCAATGC                                     |
|                                   | primer_18_F                   | caacaaatagcctaagcaatccgaagagatcgtcTTTATCATCGTCATCTTTATAATCAACCAATGC                       |
| 18                                | primer_18_R                   | caggtctgacagctccgacgaagtcgagtgggcgttagccgcTTTATCATCGTCATCTTTATAATCAACCAATGC               |
|                                   | primer_19_F                   | tccaagcaccaccctGGTGGAGGATCCGGGAGC                                                         |
| 19                                | primer_19_R                   | agctgcagcagcagccggcTTTATCATCGTCATCTTTATAATCAACCAATGC                                      |
|                                   | primer_20_F                   | gttacctaagaatcGGTGGAGGATCCGGGAGC                                                          |
| 20                                | primer_20_R                   | ggaagctgcaaaataaTTTATCATCGTCATCTTTATAATCAACCAATGC                                         |
|                                   | primer_21_F                   | agagattaccctgggctgacagagaactttttGGTGGAGGATCCGGGAGC                                        |
| 21                                | primer_21_R                   | ttgtcactgtaatacaatgcccgttctccacTTTATCATCGTCATCTTTATAATCAACCAATGC                          |
|                                   | primer_22_F                   | gatttagtacagggtlaccGGTGGAGGATCCGGGAGC                                                     |
| 22                                | primer_22_R                   | gcctacaatggcaccattTTTATCATCGTCATCTTTATAATCAACCAATGC                                       |
|                                   | primer_23_F                   | CGCTTTCTAAiGGCCACAGCG                                                                     |
| 23                                | primer_23_R                   | TGGTGCCCTTGCCCAATG                                                                        |
|                                   | primer_24_F                   | CACCACGCTTaaaatGGCCACAGCG                                                                 |
| 24                                | primer_24_R                   | CCTTGGCCCAATGCTTTAT                                                                       |
|                                   | primer_25_F                   | tctttgaacgacaagcattcaGGTGGAGGATCCGGGAGC                                                   |
| 25                                | primer_25_R                   | gctccctgagtcagaagaatgtTTTATCATCGTCATCTTTATAATCAACCAATGC                                   |
|                                   | primer_26_F                   | attaataacgttcatagtGGTGGAGGATCCGGGAGC                                                      |
| 26                                | primer_26_R                   | gtagtaccctggccaaggcTTTATCATCGTCATCTTTATAATCAACCAATGC                                      |
|                                   | primer_27_F                   | tgcaacgggtacgattcatgatcgttcccattcGGTGGAGGATCCGGGAGC                                       |
| 27                                | primer_27_R                   | tgacgaccttcagtgctgcttgagataacgcTTTATCATCGTCATCTTTATAATCAACCAATGC                          |
|                                   | primer_28_F                   | tttgcgaatgtactcctccGGTGGAGGATCCGGGAGC                                                     |
| 28                                | primer_28_R                   | gtgglacctggccaagagcTTTATCATCGTCATCTTTATAATCAACCAATGC                                      |
|                                   | primer_29_F                   | ctcgaacaacacgttccgacccgactccglacGGTGGAGGATCCGGGAGC                                        |
| 29                                | primer_29_R                   | tgcccttagacagagttgctcctggccaagcTTTATCATCGTCATCTTTATAATCAACCAATGC                          |
|                                   | <b>eGFP-fusion constructs</b> |                                                                                           |
| 30                                | primer_30_F                   | gcttctaagggccacagcAGCGGAAGTGGAGATTATAAAGATGAC                                             |
|                                   | primer_30_R                   | gtggctcctggccaatgcGGAGCTCCCGGATCCTCC                                                      |
| 31                                | primer_31_F                   | ctcgaacaataccgtccgacgactccgtacAGCGGAAGTGGAGATTATAAAGATGAC                                 |
|                                   | primer_31_R                   | tgacctctcaaaagtaglacctgcccaagcggAGCTCCCGGATCCTCC                                          |

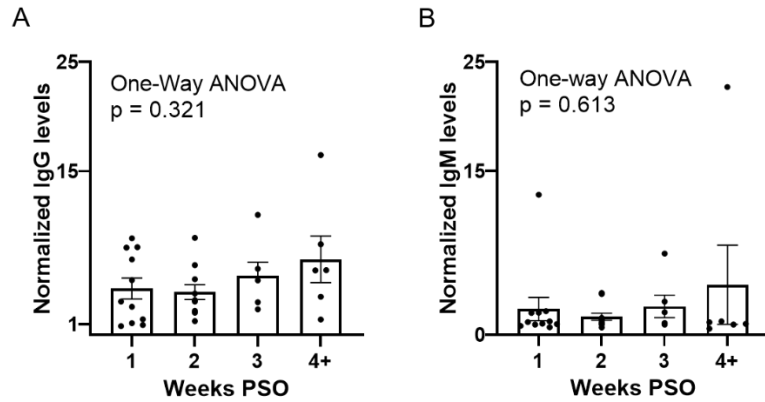

471

472 **Figure S1 | Early upregulation of  $\alpha$ Ep9 IgGs.** ELISA of  $\alpha$ Ep9 (A) IgG and (B) IgM levels in  
 473  $\alpha$ Ep9(+) patients ( $n = 34$ ) from plasma collected at the indicated time periods post-symptom onset  
 474 (PSO). Statistical analysis was conducted using one-way ANOVA, *ad hoc* Tukey test. Error bars  
 475 represent SEM.

476

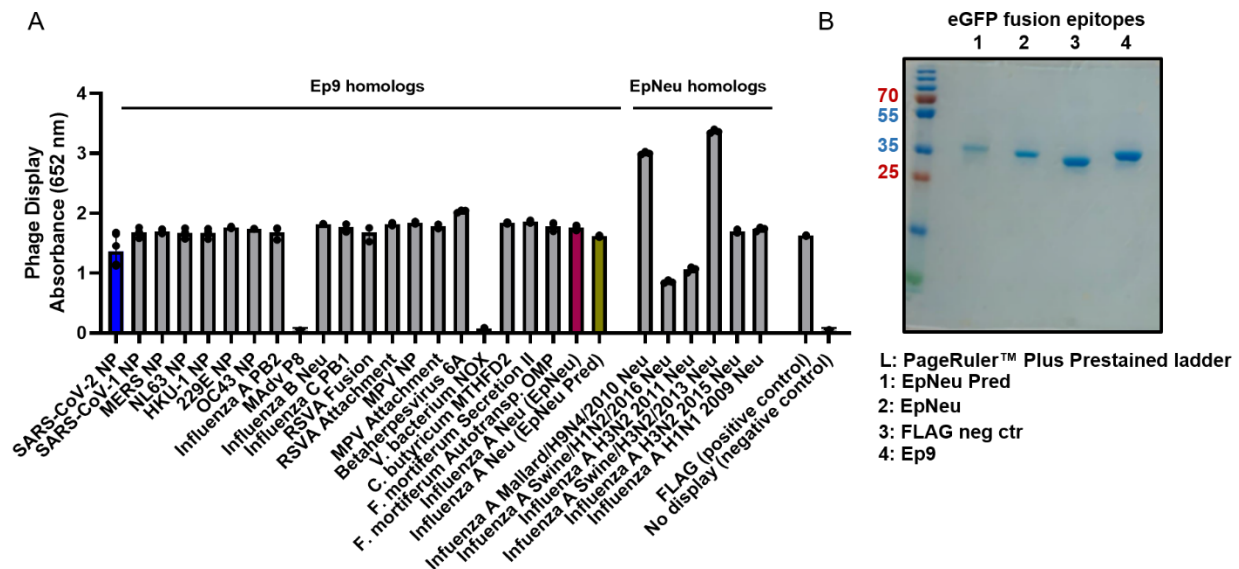

477

478 **Figure S2 | Expression of phage-displayed and eGFP-fused potential AIM epitopes.**  
 479 (A) ELISA demonstrating the display of N-terminal FLAG-tagged potential epitopes fused  
 480 to the N-terminus of the P8 coat protein. Immobilized  $\alpha$ FLAG Abs in microtiter wells bind  
 481 the displayed FLAG-tag and epitope, and binding is detected with  $\alpha$ M-13-HRP Abs as  
 482 usual. Phage with no epitope displayed provide the negative control. Epitopes for  
 483 mastadenovirus protein (mAdV) P8 and *V. bacterium* NADH oxidoreductase (NOX) did  
 484 not display. Error bars represent SD values. (B) 10% SDS-PAGE gel stained with  
 485 Coomassie Blue shows His-tag affinity-purified and buffer-exchanged eGFP-fused  
 486 epitopes, EpPred, EpNeu, FLAG negative control and Ep9.

487

488

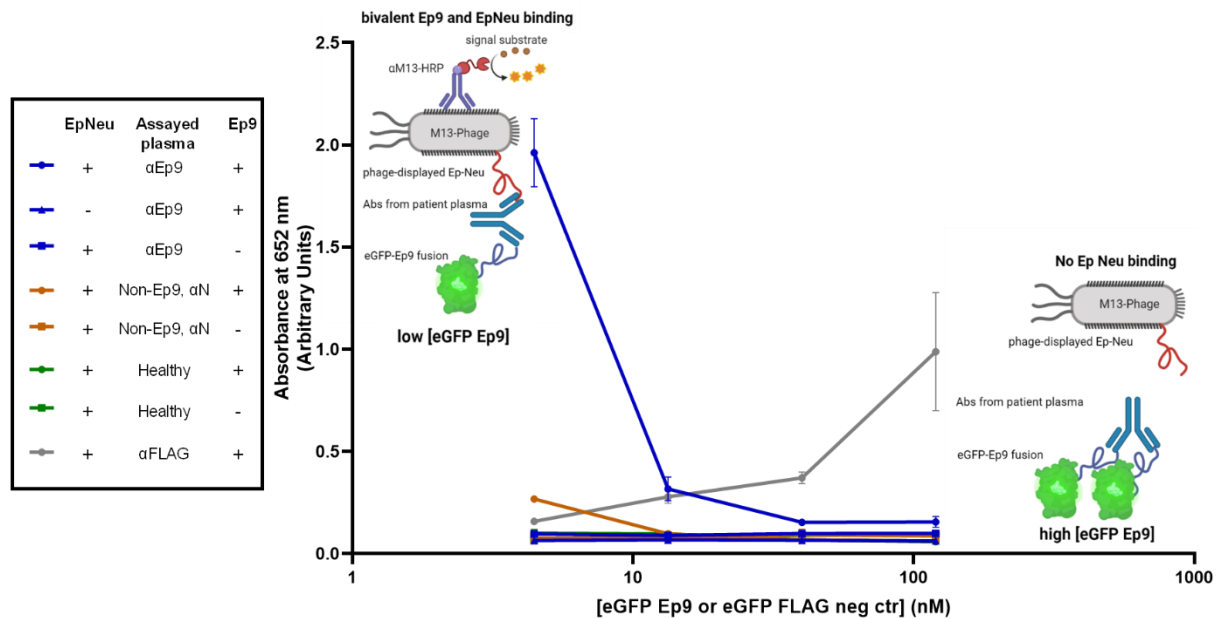

489

490

491

492

493

494

495

496

497

498

499

500

501

**Figure S3 | Optimization of assay to determine cross-reactivity of αEp9 Ab to Ep9 and EpNeu.** Sandwich ELISA testing the binding of Abs from the pooled plasma of five αEp9(+) patients, five αEp9(-) patients with other αNP Abs and healthy individuals. This experiment examines bivalent binding to various doses of immobilized eGFP-fused Ep9 epitope (120, 40, 13 and 4 nM) and phage-displayed EpNeu in solution. The data shows that Abs from αEp9(+) patients, but not αEp9(-) or healthy individuals, bivalently bind both EpNeu and Ep9. The positive control (αFLAG 1:2000 fold dilution) at 100 nM eGFP demonstrates concentrations appropriate for bivalent binding to immobilized and in-solution tags. The schematic diagram illustrates the binding observed for bivalence in αEp9 Abs, where the antibody bridges plate-bound eGFP at its high concentrations. Therefore, Figure 2 in the main text uses 4 nM of eGFP Ep9 coated on the plate, and the FLAG positive control uses eGFP at 100 nM. Error bars represent SD.

502



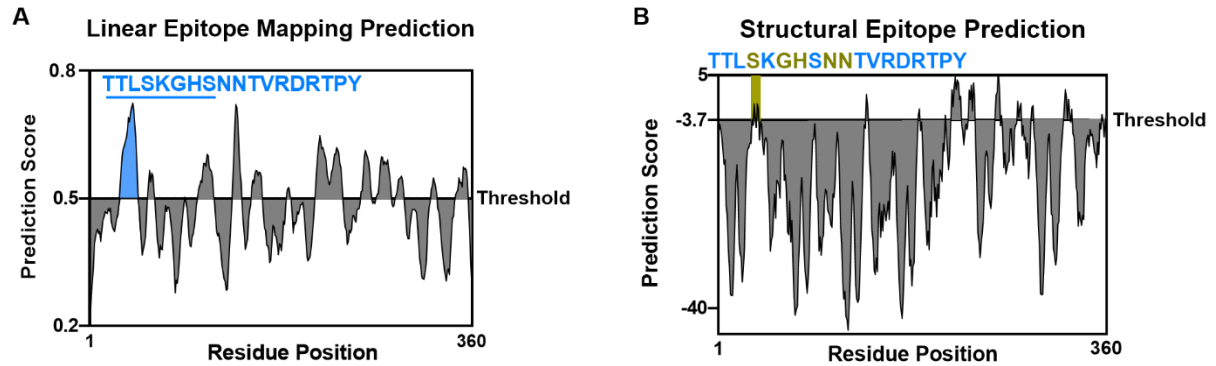

503

504 **Figure S4 | Linear and structural epitope mapping prediction of Influenza A H3N2**  
505 **Neuraminidase.** (A) Linear epitope mapping prediction of the Flu A 2014 H3N2 using  
506 Bepired 2.0<sup>13</sup> demonstrates high prediction scores in a region spanning 18 residues,  
507 which includes eight residues from EpNeu (underlined). The additional 10 predicted  
508 residues were included as part of an extended epitope termed EpPred. (B) Structural  
509 epitope mapping, using Discotope 2.0<sup>16</sup>, of the modelled neuraminidase protein from Flu  
510 A 2014 H3N2 (SWISS-model<sup>21</sup>), predicts an epitope of five residues. These were  
511 captured by EpPred, including three found in EpNeu.  
512

## 513 References

514

- 515 1. Fierz, W. & Walz, B. Antibody Dependent Enhancement Due to Original Antigenic  
516 Sin and the Development of SARS. *Front. Immunol.* **11**, 1120 (2020).
- 517 2. Brown, E. L. & Essigmann, H. T. Original Antigenic Sin: the Downside of  
518 Immunological Memory and Implications for COVID-19. *mSphere* **6**, (2021).
- 519 3. Kohler, H. & Nara, P. A Novel Hypothesis for Original Antigenic Sin in the Severe  
520 Disease of SARS-CoV-2 Infection. *Monoclonal Antibodies in Immunodiagnosis  
521 and Immunotherapy* **39**, 107–111 (2020).
- 522 4. Ng, K. W. *et al.* Preexisting and de novo humoral immunity to SARS-CoV-2 in  
523 humans. *Science (80-. )*. **370**, 1339–1343 (2020).
- 524 5. Anderson, E. M. *et al.* Seasonal human coronavirus antibodies are boosted upon  
525 SARS-CoV-2 infection but not associated with protection. *medRxiv* **7**,  
526 2020.11.06.20227215 (2020).
- 527 6. Focosi, D. *et al.* Previous humoral immunity to the endemic seasonal  
528 alphacoronaviruses NL63 and 229E is associated with worse clinical outcome in  
529 COVID-19 and suggests original antigenic sin. *Life* **11**, (2021).
- 530 7. Shrock, E. *et al.* Viral epitope profiling of COVID-19 patients reveals cross-  
531 reactivity and correlates of severity. *Science (80-. )*. eabd4250 (2020).  
532 doi:10.1126/science.abd4250
- 533 8. Wang, L. *et al.* Serological Responses to Human Virome Define Clinical  
534 Outcomes of Italian Patients Infected with SARS-CoV-2. *medRxiv Prepr. Serv.  
535 Heal. Sci.* (2020). doi:10.1101/2020.09.04.20187088
- 536 9. Sen, S. R. *et al.* Predicting COVID-19 Severity with a Specific Nucleocapsid  
537 Antibody plus Disease Risk Factor Score. *mSphere* **6**, e00203-21 (2021).
- 538 10. Altschul, S. F. *et al.* Gapped BLAST and PSI-BLAST: A new generation of protein  
539 database search programs. *Nucleic Acids Research* **25**, 3389–3402 (1997).
- 540 11. Madej, T. *et al.* MMDB and VAST+: Tracking structural similarities between  
541 macromolecular complexes. *Nucleic Acids Res.* **42**, (2014).
- 542 12. World Health Organization. WHO | Cumulative Number of Reported Probable  
543 Cases of Severe Acute Respiratory Syndrome (SARS). *WHO* 9–11 (2013).  
544 Available at: <http://www.who.int/csr/sars/country/en/>. (Accessed: 16th May 2021)
- 545 13. Jespersen, M. C., Peters, B., Nielsen, M. & Marcatili, P. BepiPred-2.0: Improving  
546 sequence-based B-cell epitope prediction using conformational epitopes. *Nucleic  
547 Acids Res.* **45**, W24–W29 (2017).
- 548 14. Gentles, L. E., Wan, H., Eichelberger, M. C. & Bloom, J. D. Antibody  
549 neutralization of an influenza virus that uses neuraminidase for receptor binding.  
550 *Viruses* **12**, 2020.05.08.084954 (2020).
- 551 15. Studer, G. *et al.* ProMod3 - A versatile homology modelling toolbox. *PLoS  
552 Comput. Biol.* **17**, (2021).
- 553 16. Kringelum, J. V., Lundegaard, C., Lund, O. & Nielsen, M. Reliable B Cell Epitope  
554 Predictions: Impacts of Method Development and Improved Benchmarking. *PLoS  
555 Comput. Biol.* **8**, (2012).
- 556 17. Lipničanová, S., Chmelová, D., Godány, A., Ondrejovič, M. & Miertuš, S.  
557 Purification of viral neuraminidase from inclusion bodies produced by recombinant  
558 *Escherichia coli*. *J. Biotechnol.* **316**, 27–34 (2020).



- 559 18. Xie, H. *et al.* H3N2 Mismatch of 2014-15 Northern Hemisphere Influenza  
560 Vaccines and Head-to-head Comparison between Human and Ferret Antisera  
561 derived Antigenic Maps. *Sci. Rep.* **5**, 1–10 (2015).
- 562 19. Flannery, B. *et al.* Enhanced Genetic Characterization of Influenza A(H3N2)  
563 Viruses and Vaccine Effectiveness by Genetic Group, 2014-2015. in *Journal of*  
564 *Infectious Diseases* **214**, 1010–1019 (Oxford University Press, 2016).
- 565 20. Letunic, I. & Bork, P. Interactive Tree of Life (iTOL) v4: Recent updates and new  
566 developments. *Nucleic Acids Res.* **47**, W256–W259 (2019).
- 567 21. Waterhouse, A. *et al.* SWISS-MODEL: Homology modelling of protein structures  
568 and complexes. *Nucleic Acids Res.* **46**, W296–W303 (2018).
- 569 22. Benchling, I. Benchling [Biology Software]. Retrieved from <https://benchling.com>  
570 (2017).
- 571 23. Levin, A. M. Exploring the interaction between the protein kinase A catalytic  
572 subunit and caveolin-1 scaffolding domain with shotgun scanning, oligomer  
573 complementation, NMR, and docking. *Protein Sci.* **15**, 478–486 (2006).
- 574 24. Pastorino, B., Touret, F., Gilles, M., de Lamballerie, X. & Charrel, R. N. Heat  
575 inactivation of different types of SARS-CoV-2 samples: What protocols for  
576 biosafety, molecular detection and serological diagnostics? *Viruses* **12**, 735–743  
577 (2020).
- 578 25. Mukaka, M. M. Statistics corner: A guide to appropriate use of correlation  
579 coefficient in medical research. *Malawi Med. J.* **24**, 69–71 (2012).
- 580
